# Supplementary material for: The Contribution of Occult Precipitation to Nutrient Deposition on the West Coast of South Africa
Source: PLoS One. 2015 May 27;10(5):e0126225. doi: 10.1371/journal.pone.0126225 (PMC4446095; doi:10.1371/journal.pone.0126225)
Supplement: S1 Dataset — (XLSX) [file pone.0126225.s001.xlsx]

## Sheet: HP and Rain data
Horizontal precipitation and rain
Notes
1. Horizontal precipitation and rain samples were colected in 2011 on an ocean-land transect between 0.1 km and 16.82 km from the sea
2. Data on nutrient analyses were adjusted for the volume used to wash the funnels at time of collection.													Horizontal precipitation																Rain
													Adjusted (ppm)																Adjusted (ppm)
Month	Season	Year	Days	Distance (km)	Horizontal ppt Vol (ml)	Horizontal precipitation (L/m2)	Rain volume ml	Rain precipitation (L/m2)	HP/Rain	Wind speed (m/s)	Temp (oC)	Elevation (m)	NO3-	NH4+	DIN	Total N	DON	PO43-	Total P	DOP	Si	Mn	Fe	Mg	Ca	Al	Na	K	NO3-	NH4+ conc ppm	PO43-	DIN	TN	DON	Total P	DOP	Si	Mn	Fe	Mg	Ca	Al	K	Na
Jan	Summer	2011	47	0.1	210	1.32844	64	5.65884	0.234754	2.7	19.4	0	0.451153	3.00159	3.45274	81.9	78.4473	1.45011	0.383578	-1.06653	0.269063	0.0643125	0.0122377	49.5808	35.8861	0.018375	274.754	20.5853	3.09852	0.209371	1.7664	3.30789			0.9008		1.248	0.384	0.108928	39.5945	179.64	0.62904	6.31611	28.8737
Jan	Summer	2011	47	6.09	750	4.74441	108	9.5493	0.496834	2.7	19.4	53	0.723019	0.797656	1.52068	31.4347	29.914	0.103784	0.45136	0.347576	0.362667	0.096	0.00773547	77.1072	50.7134	0.0149333	519.388	31.1062	1.20909	0.330872	0.446161	1.53996	9.05897	7.51901	0.376045		0.534414	0.137793	0.0675186	21.7905	80.5165	0.252313	8.81839	16.4205
Jan	Summer	2011	47	7.99	750	4.74441	105	9.28404	0.511029	2.7	19.4	63	0.630279	1.30832	1.9386	49.9307	47.9921	0.0534633	0.74256	0.689097	0.594133	0.0746667		70.3552	74.6491	0.0149333	503.168	26.7076	1.21843	1.3224	0.403874	2.54083	5.71582	3.17499	0.170386		0.225273	0.0381818	0.021756	8.78609	69.3961	0.0822177	3.09862	5.91554
Jan	Summer	2011	47	10.65	255	1.6131	113	9.99139	0.161449	2.7	19.4	41	0.810517	0.198839	1.00936	51.9457	50.9363	0.223114	0.663525	0.44041	0.254765	0.0861176	0.0173479	60.0706	54.5831	0.0288963	375.748	22.6963	0.885603	0.110147	0.16932	0.99575	3.46533	2.46958	0.193983	0.024663	0.667238	0.0286984	0.0817618	4.20052	28.178	0.263767	1.46161	2.62162
Jan	Summer	2011	47	12.53	430	2.72013	107	9.46088	0.287514	2.7	19.4	29	0.712701	0.857544	1.57024	41.2912	39.7209	0.171723	0.373898	0.202175	0.22214	0.0502326	0.00893023	40.2151	36.8474	0.0156279	273.524	17.262	0.322614	0.24446	0.233021	0.567074	11.6874	11.1203	0.243754	0.0107328	0.133281	0.304105	0.0719566	16.9457	56.116	0.0552105	8.04276	15.0978
Jan	Summer	2011	47	14.59	800	5.06071	243	21.4859	0.235536	2.7	19.4	44	0.657937	0.508458	1.16639	27.37	26.2036	0.0817047	0.557441	0.475736	0.23375	0.0520625	0.0085	41.3604	42.0356	0.014875	281.042	18.4057	0.883198	0.172589	0.0314762	1.05579	3.94718	2.89139	0.144982	0.113505	0.234187	0.0654715	0.0143483	5.2569	25.015	0.0542235	3.34027	4.20563
Feb	Summer	2011	27	0.1	1810	11.4499	50.5	4.46518	2.56425	1.6	18.6	0	0.292373	3.43967	3.73205	16.4134	12.6814	0.705928	0.231443	-0.474485	0.294125	0.0359943	0.00822727	31.6636	20.5212	0.0143977	260.313	12.3778	0.894142	0.0597634	0.0972749	0.953905	2.53929	1.58539	0.112807	0.0155318	0.146146	0.0417561	0.185204	12.6876	13.3257	0.0452312	6.88712	8.98685
Feb	Summer	2011	27	6.09	960	6.07285	98	8.6651	0.70084	1.6	18.6	53	0.67569	0.57087	1.24656	5.23937	3.99281	0.0865151	0.257392	0.170877	0.393479	0.0431354	0.00980962	32.4901	21.4272	0.0147292	264.638	12.6956	1.20909	0.330872	0.446161	1.53996	9.05897	7.51901	0.376045		0.534414	0.137793	0.0675186	21.7905	80.5165	0.252313	8.81839	16.4205
Feb	Summer	2011	27	7.99	292	1.84716	101	8.93036	0.20684	1.6	18.6	63	0.69323	0.966969	1.6602	0	-1.6602	0.0993388	0.614487	0.515149	0.672288	0.0550479	0.00936986	43.5007	72.4738	0.0163973	360.575	17.306	55.0911	4.6258	4.51822	59.7169			118.069	113.551	94.94	22.523	7.53379	2539.35	12726.1	25.0373	13.1019	1323.29
Feb	Summer	2011	27	10.65	365	2.30895	93	8.22301	0.280791	1.6	18.6	41	0.745673	0.631785	1.37746	24.9114	23.5339	0.110753	0.271797	0.161043	0.209205	0.0238767	0.00909589	14.1442	18.2765	0.0159178	338.572	16.2645	13.7911	1.1908	7.7983	14.9819			4.5045		11.57	7.514	2.07407	712.57	2534.98	3.82346	13.5755	352.962
Feb	Summer	2011	27	14.59	840	5.31374				1.6	18.6	44	0.627576	1.13274	1.76032	26.7742	25.0138	0.170586	0.570712	0.400127	0.53506	0.0455595	0.00847619	33.9951	32.649	0.0148333	293.387	13.0847	7.30976	0.5038	2.0614	7.81356	23.254		0.0847		0.407	0.011	0.088	0.055	0.572	0.154	0.141	1.551
Mar	Autumn	2011	42	0.1	155	0.980512	85	7.51565	0.130463	1.8	17	0	0.898064	5.46601	6.36407	55.7705	49.4064	0.797486	3.87648	3.07899	6.87048	0.170795	0.0989048	113.501	150.045	0.0247188	606.646	47.5163	18.2864	4.6258	15.0132	22.9122			0.7777		3.737	0.101	0.808	0.505	5.252	1.414	0.141	14.241
Mar	Autumn	2011	42	6.09	850	5.377	188	16.6228	0.323471	1.8	17	53	1.24742	0.257183	1.5046	22.5635	21.0589	0.0201261	0.249882	0.229756	0.287116	0.0619412	0.00847059	38.3586	28.1435	0.0158824	282.425	12.5164	7.08485	0.5038	3.51932	7.58865	27.225		0.0847		0.407	0.011	0.088	0.055	0.572	0.154	0.141	1.551
Mar	Autumn	2011	42	7.99	920	5.81981	94	8.31142	0.700219	1.8	17	63	0.83687	0.854464	1.69133	31.0084	29.317	0.00998835	0.262533	0.252544	0.180088	0.0712739	0.0115978	38.1634	26.7593	0.0390109	283.885	11.8477	34.0728	2.3358	11.1361	36.4086			0.3927		1.887	0.051	0.408	0.255	2.652	0.714	0.141	7.191
Mar	Autumn	2011	42	10.65	340	2.1508				1.8	17	41	1.25675	0.0525353	1.30929	52.6041	51.2948	0.14514	0.637765	0.492625	0.271193	0.0551735	0.00917647	29.9758	44.0574	0.0160588	245.565	8.60065	13.7911	1.1908	7.7983	14.9819			4.5045		11.57	7.514	2.07407	712.57	2534.98	3.82346	13.5755	352.962
Mar	Autumn	2011	42	12.53	330	2.08754	119	10.5219	0.1984	1.8	17	29	0.886081	0.395596	1.28168	33.8315	32.5498	0.0504912	0.680545	0.630054	0.213353	0.112273	0.00921212	46.4734	43.9349	0.0309044	370.235	14.7494	0.376633	0.111229	0.346727	0.487862	3.71329	3.22542	0.573143	0.226416	0.269511	0.0284143	0.0194286	29.8666	24.8224	0.034	4.948	12.0166
Mar	Autumn	2011	42	14.59	730	4.6179	107	9.46088	0.488104	1.8	17	44	1.43005	0.985601	2.41565	26.7551	24.3394	0.0459679	0.209425	0.163457	0.133011	0.0430603	0.00854795	28.2273	19.2222	0.0149589	205.796	8.87081	0.409015	0.0623942	0.0129059	0.47141	5.40977	4.93836	0.0104899		0.1078	0.0177101	0.0108986	2.55539	16.1429	0.0326957	0.821	1.11846
Mar	Autumn	2011	42	16.82	720	4.55464	75	6.63146	0.686823	1.8	17	47	1.55877	0.0489806	1.60775	24.8111	23.2034	0.14846	0.638458	0.489999	0.285868	0.0931486	0.00855556	52.0828	40.5213	0.0221888	403.021	16.6437	2.63265	0.0978455	0.0202388	2.7305	4.27914		0.01645		0.111326	0.0361045	0.0170909	9.9694	14.6863	0.0320455	3.801	8.12032
Apr	Autumn	2011	30	0.1	260	1.64473	119	10.5219	0.156315	2.1	12.9	0	1.3986	0.0567048	1.4553	44.0019	42.5466	0.0960733	0.78619	0.690117	2.74556	0.0289714	0.012381	178.428	78.7268	0.0173333	1274.76	57.0039	0.934786	1.78885	1.74842	2.72363	5.34945		4.19155	2.44312	0.360778	0.0194409	0.0170909	3.10499	21.2893	0.0299091	6.787	14.4995
Apr	Autumn	2011	30	6.09	530	3.35272	68	6.01252	0.557623	2.1	12.9	53	1.03035	0.0501208	1.08047	25.2026	24.1222	0.0310772	0.292189	0.261112	0.416079	0.0597509	0.0229811	66.4273	30.8232	0.166681	509.788	19.0266	1.66938	0.0789884	0.261109	1.74837	4.44957	2.70119	0.320783	0.0596736	0.0798852	0.0381145	0.0137971	4.37617	22.6102	0.062087	4.522	7.79881
Apr	Autumn	2011	30	7.99	648	4.09917	125	11.0524	0.370884	2.1	12.9	63	1.2121	0.049334	1.26144	30.5914	29.3299	0.0192882	0.339306	0.320017	0.293128	0.0336074	0.135722	37.7374	22.9656	0.219099	317.706	10.7212	2.34984	0.0859754	0.281692	2.43581	3.86326		0.247789		0.137673	0.1391	0.0150175	11.7124	20.8955	0.107	6.049	11.3551
Apr	Autumn	2011	30	10.65	218	1.37904	129	11.4061	0.120904	2.1	12.9	41	1.0274	0.0563046	1.0837	34.8277	33.744	0.0501654	0.297505	0.247339	0.302514	0.0319633	0.145064	27.6189	31.3978	0.347235	215.303	7.82144	2.58279	0.1374	0.171501	2.72019	7.656		0.0231		0.153435	0.0507	0.024	6.44565	26.889	0.102	1.509	4.527
Apr	Autumn	2011	30	12.53	185	1.17029	105	9.28404	0.126054	2.1	12.9	29	1.3479	0.0581784	1.40607	37.5873	36.1812	0.132268	0.598297	0.466029	0.771035	0.0957784	0.0952703	71.1798	51.5241	0.393078	524.888	21.4844	0.409015	0.0623942	0.0129059	0.47141	5.40977	4.93836	0.0104899		0.1078	0.0177101	0.0108986	2.55539	16.1429	0.0326957	0.821	1.11846
Apr	Autumn	2011	30	14.59	350	2.21406				2.1	12.9	44	1.11353	0.0523429	1.16587	25.6114	24.4456	0.0386635	0.36	0.321336	0.531577	0.0475429	0.16	46.3079	33.336	0.304073	334.103	13.588	0.409015	0.0623942	0.0129059	0.47141	5.40977	4.93836	0.0104899		0.1078	0.0177101	0.0108986	2.55539	16.1429	0.0326957	0.821	1.11846
Apr	Autumn	2011	30	16.82	360	2.27732				2.1	12.9	47	1.35924	0.0521611	1.4114	16.7758	15.3644	0.12717	0.633222	0.506052	0.363778	0.0784694	0.0193611	61.5	46.9319	0.0219578	411.515	19.8261	0.465194	0.0789884	0.136945	0.544182	1.32418	0.779995	0.201783	0.0648377	0.254634	0.0538087	0.0137971	41.6591	24.6891	0.0241449	10.0446	17.3232
May	Autumn	2011	33	0.1	790	4.99745	460	40.6729	0.122869	2.8	12.7	0	0.716617	0.0488946	0.765512	16.4405	15.675	0.0316685	0.30172	0.270052	0.109201	0.0192521	0.13272	14.5478	9.00101	0.213031	105.999	4.69082	2.06694	0.173022	0.151255	2.23996	24.7898	22.5498	0.0290889		0.776503	0.0294667	0.0302222	18.6207	58.99	0.0528889	3.21006	12.1269
May	Autumn	2011	33	6.09	1335	8.44506	325	28.7363	0.293881	2.8	12.7	53	0.606011	0.388355	0.994366	16.537	15.5426	0.0159749	0.174628	0.158653	0.229262	0.0235427	0.194263	32.7592	15.559	0.244026	246.651	7.77016	0.197389	0.0763333	0.0157891	0.273722			0.0128333		0.0616667	0.013	0.0833333	4.01833	5.805	0.164798	1.28012	2.13354
May	Autumn	2011	33	7.99	1544	9.76717	485	42.8834	0.227761	2.8	12.7	63	1.0567	0.381155	1.43786	10.0358	8.59794	0.0426724	0.117477	0.0748045	0.166374	0.0177801	0.137142	25.4368	14.5433	0.169187	183.183	5.78316	0.629845	0.0747873	0.0478383	0.704632			0.195949	0.148111	0.258425	0.00424557	0.0130633	3.02415	11.2753	0.0228608	0.945736	1.5443
May	Autumn	2011	33	10.65	920	5.81981	498	44.0329	0.13217	2.8	12.7	41	1.05623	0.145569	1.2018			0.0308956	0.239352	0.208456	0.0966573	0.0153102	0.0655066	16.3554	12.9436	0.120951	93.0065	3.40832	0.0479388	0.0874364	0.0180857	0.135375	3.14427	3.0089	0.0147		0.0681641	0.0198545	0.0152727	3.80482	14.721	0.0482962	1.38238	2.63908
May	Autumn	2011	33	12.53	1048	6.62953	615	54.3779	0.121916	2.8	12.7	29	0.982432	0.0479851	1.03042	13.945	12.9146	0.0235934	0.226557	0.202963	0.103126	0.0138518	0.13945	16.7692	9.32446	0.218158	85.1406	3.69205	0.0494578	0.0670037	0.183529	0.116461	1.12165	1.00519	0.294056	0.110526	0.266822	0.243437	0.0117037	18.6133	31.1201	0.0204815	6.62976	9.69909
May	Autumn	2011	33	14.59	1320	8.35017				2.8	12.7	44	1.06851	0.0475348	1.11604	16.7929	15.6768	0.0166896	0.0799167	0.0632271	0.176273	0.016964	0.144006	24.6676	13.3493	0.165085	203.502	7.64676	0.182053	0.33205	3.914	0.514103	4.2572	3.7431	6.47425	2.56025	1.18936	0.20735	0.058	33.466	85.5427	0.161247	6.1337	44.4693
Jun	Winter	2011	36	0.1	1495	9.4572	800	70.7355	0.133698	3.4	9.8	0	0.0656919	0.0473848	0.113077	5.84136	5.72829	0.00980129	0.150439	0.140638	0.590049	0.0010346	0.0312864	35.8753	14.2312	0.041889	295.841	10.8982	2.06694	0.173022	0.151255	2.23996	24.7898	22.5498	0.0290889		0.776503	0.0294667	0.0302222	18.6207	58.99	0.0528889	3.21006	12.1269
Jun	Winter	2011	36	6.09	2130	13.4741	408	36.0751	0.373502	3.4	9.8	53	0.544492	0.450793	0.995285	7.9135	6.91822	0.00969587	0.0788075	0.0691116	0.0750616	0.00615231	0.00818779	17.539	8.06549	0.0143286	146.654	5.51824	0.0469194	0.0513854	0.0437923	0.0983048	1.24537	1.14706	0.133979	0.0901866	0.0898627	0.0141507	0.00897561	5.5568	4.54922	0.0292021	1.75259	1.96632
Jun	Winter	2011	36	7.99	1710	10.8173				3.4	9.8	63	0.32948	0.0471392	0.376619	3.9636	3.58698	0.0141728	0.133851	0.119678	0.134084	0.00773371	0.00823392	26.7385	13.0295	0.0144094	226.95	8.3009	0.221315	0.0541273	0.0111959	0.275443	2.20764	1.93219	0.158364	0.147168	0.0615845	0.0245818	0.0590909	3.77591	11.8932	0.0706349	1.49274	1.76414
Jun	Winter	2011	36	10.65	1437	9.0903	895	79.1354	0.11487	3.4	9.8	41	0.133524	0.0473936	0.180918	5.52684	5.34592	0.0205848	0.11338	0.0927956	0.0868762	0	0.00827836	9.99173	8.33865	0.0144871	94.0196	3.2673	0.179792	0.0510644	0.0105624	0.230856			0.00858506		0.0412529	0.00111494	0.0423678	1.6267	3.04156	0.0730867	1.30138	1.45097
Jun	Winter	2011	36	12.53	1735	10.9754	905	80.0196	0.137159	3.4	9.8	29	0.142909	0.0471199	0.190029	2.90333	2.7133	0.00974649	0.1201	0.110354	0.062547	0.00618443	0.00823055	10.0054	5.66149	0.0168603	81.9944	3.46579	0.0279134	0.0509116	0.0105308	0.078825	1.484	1.40517	0.00855937		0.0411295	0.00111161	0.0113384	0.993034	3.81581	0.0567942	0.50814	0.564852
Jun	Winter	2011	36	14.59	2170	13.7272	1086	96.0235	0.142956	3.4	9.8	44	0.169352	0.0468553	0.216207	8.5383	8.3221	0.0161357	0.0787742	0.0626385	0.0730554	0.00102304	0.00818433	7.57714	4.39663	0.0143226	61.41	2.32272	0.333616	0.0498531	0.02814	0.383469			0.00838142		0.0402743	0.00588092	0.0325134	1.04121	3.90086	0.0566627	0.505607	0.550351
Jun	Winter	2011	36	16.82	2284	14.4483	890	78.6933	0.183603	3.4	9.8	47	0.315265	0.0468026	0.362067	9.83162	9.46955	0.0174179	0.0786856	0.0612677	0.0680426	0.00614279	0.00817513	8.41427	5.2208	0.0143065	67.4312	2.66317	0.373795	0.0490714	0.0709757	0.422867	0.5055	0.0826333	0.15768	0.0867043	0.0496286	0.0483544	0.158229	3.0888	9.99999	0.116713	2.24741	2.40793
Jul	Winter	2011	39	0.1	1410	8.9195	475	41.9992	0.212373	2.4	7.7	0	0.237731	0.0474838	0.285215	9.96849	9.68328	0.022767	0.273905	0.251138	1.13954	0.0155805	0.0568976	100.992	43.2747	0.0729592	764.129	29.7678	0.250651	0.0545072	0.134887	0.305159	0.367388	0.0622296	0.146646	0.0117591	0.150448	0.00119011	0.0112466	1.05694	2.32753	0.0493326	1.40087	1.66719
Jul	Winter	2011	39	6.09	1460	9.23579				2.4	7.7	53	0.878943	1.52877	2.40771	13.0625	10.6548	0.00979792	0.079637	0.0698391	0.198612	0.0217597	0.00827397	33.5325	20.0392	0.0144795	264.673	10.5338	0.221315	0.0541273	0.0111959	0.275443	2.20764	1.93219	0.158364	0.147168	0.0615845	0.0245818	0.0590909	3.77591	11.8932	0.0706349	1.49274	1.76414
Jul	Winter	2011	39	7.99	1508	9.53943	492	43.5024	0.219285	2.4	7.7	63	0.83373	0.0473186	0.881049	6.34358	5.46253	0.057495	0.245445	0.18795	0.297105	0.0263947	0.00826525	19.7029	17.1521	0.027887	155.151	6.01596	0.0286179	0.0521966	0.0107966	0.0808146	0.397629	0.316814	0.00877542		0.0978801	0.00113966	0.00911732	1.22464	3.05775	0.0159553	0.424706	0.484023
Jul	Winter	2011	39	10.65	935	5.9147	586	51.8138	0.114153	2.4	7.7	41	0.686008	0.0482492	0.734257	10.7771	10.0428	0.0791572	0.158578	0.0794204	0.138258	0.0126653	0.00842781	7.18141	9.64533	0.0192955	59.5928	2.36819	0.027333	0.0498531	0.129642	0.0771861	0.418091	0.340905	0.00838142		0.506292	0.0010885	0.00870796	1.37909	2.42678	0.0152389	1.17283	1.27662
Jul	Winter	2011	39	12.53	1350	8.53994	550	48.6307	0.175608	2.4	7.7	29	0.865359	0.0474963	0.912856	6.98652	6.07366	0.0647903	0.189023	0.124232	0.141104	0.0233769	0.00929185	11.2662	10.3509	0.0649807	95.6847	3.81311	0.0265967	0.0485101	0.010034	0.0751067	0.343595	0.268489	0.00815562		0.0391893	0.00105917	0.00847337	0.532822	2.00634	0.0148284	0.141	0.149343
Jul	Winter	2011	39	14.59	1670	10.5642	580	51.2833	0.205998	2.4	7.7	44	0.823859	2.78164	3.6055	22.1849	18.5794	0.011502	0.0793054	0.0678034	0.0705663	0.0139301	0.00823952	8.15415	8.12403	0.0144192	56.6462	2.47475	0.0265793	0.0484784	0.0100275	0.0750576	1.28605	1.21099	0.00815029		0.0520931	0.00105848	0.00846784	0.888221	5.78774	0.0148187	0.330649	0.349985
Jul	Winter	2011	39	16.82	1635	10.3428	575	50.8412	0.203434	2.4	7.7	47	0.860899	0.605245	1.46614	16.3244	14.8583	0.0966109	0.164629	0.0680182	0.192935	0.0263289	0.00824465	12.5982	11.6087	0.0144281	85.0957	3.8796	0.0322346	0.0480104	0.0412936	0.080245	1.10697	1.02672	0.00807162		0.0387857	0.00104826	0.0083861	0.642695	1.06777	0.0146757	0.253956	0.266212
Aug	Winter	2011	35	0.1	825	5.21885	195	17.2418	0.302686	3	9	0	1.97798	3.01767	4.99565			0.457795	2.95665	2.49886	10.2492	0.0749419	0.895258	0.00532258	362.83	1.24778	12089.8	442.488	0.0266055	0.0485262	0.0107677	0.0751317	0.977411	0.902279	0.00815833		0.0490771	0.00105952	0.00847619	0.65084	1.72742	0.0194062	0.291579	0.308934
Aug	Winter	2011	35	7.99	855	5.40863	173	15.2966	0.353585	3	9	63	1.76983	0.0484784	1.81831	11.9502	10.1319	0.0100275	0.0815029	0.0714754	0.21593	0.0104789	0.00846784	23.6221	14.443	0.0148187	220.131	7.75188	0.0286179	0.0521966	0.0107966	0.0808146	0.397629	0.316814	0.00877542		0.0978801	0.00113966	0.00911732	1.22464	3.05775	0.0159553	0.424706	0.484023
Aug	Winter	2011	35	10.65	475	3.0048				3	9	41	7.38541	0.0506211	7.43603	17.4853	10.0492	0.018853	0.216455	0.197602	0.245368	0.0206684	0.00884211	30.5848	25.7471	0.0154737	276.302	10.6142	0.028065	0.0511882	0.217365	0.0792533	1.60047	1.52122	0.305574	0.0882082	0.182271	0.0100776	0.0112659	8.13029	10.5902	0.054948	5.99436	6.69958
Aug	Winter	2011	35	12.53	560	3.5425	205	18.126	0.195437	3	9	29	7.91254	0.0498893	7.96242	21.6441	13.6817	0.0103193	0.26999	0.259671	0.222214	0.03355	0.00871429	37.6326	20.4884	0.01525	347.302	12.8795	0.0333149	0.05725	0.0118419	0.0905649	0.55325	0.462685	0.22656	0.214718	0.199031	0.00125	0.0434	2.56383	7.64279	0.14942	0.703985	0.879981
Aug	Winter	2011	35	14.59	910	5.75655				3	9	44	7.08259	0.0483165	7.13091	15.5604	8.42953	0.009994	0.120517	0.110523	0.209934	0.0243692	0.00843956	37.2375	20.8278	0.0156659	316.453	12.7167	0.152406	0.050981	0.0105451	0.203387	0.398386	0.194999	0.00857104		0.226648	0.00111312	0.00890498	2.00199	10.1272	0.0155837	0.540469	0.601609
Aug	Winter	2011	35	16.82	1040	6.57892	190	16.7997	0.39161	3	9	47	1.78761	0.0480019	1.83561	13.9185	12.0829	0.0287057	0.27795	0.249244	0.184462	0.0288221	0.00838462	32.1697	15.4728	0.0146731	268.488	11.1201	0.196521	0.0500724	0.0103572	0.246594			0.00841828		0.0404515	0.00109328	0.00874627		0.0568507	0.015306	0.141	0.154153
Sep	Spring	2011	30	0.1	730	4.6179	209	18.4797	0.249891	2.2	11.3	0	2.1677	6.56637	8.73407	43.9718	35.2377	0.521791	3.84236	3.32056	15.0724	0.0519588	0.956515	1484.37	505.042	1.14675	12076.7	420.48	0.132619	0.05038	0.0104208	0.182999	2.8633	2.6803	0.00847		0.236714	0.0011	0.023408	1.35368	7.76604	0.0869528	1.73717	1.91089
Sep	Spring	2011	30	3.545	460	2.90991	135	11.9366	0.24378	2.2	11.3	11	11.246	0.418712	11.6647	41.8865	30.2218	0.0790544	0.44217	0.363116	0.563217	0.08415	0.00886957	98.7959	45.7415	0.0340259	803.214	28.5375	0.054774	0.0501208	0.0103672	0.104895	2.22151	2.11661	0.00842642		0.164742	0.011512	0.00875472	1.73056	7.13955	0.0153208	0.471012	0.515447
Sep	Spring	2011	30	6.09	450	2.84665	119	10.5219	0.270545	2.2	11.3	53	5.25148	2.83767	8.08916	30.2889	22.1997	0.0883131	0.243667	0.155354	0.484444	0.0391111	0.0388889	53.67	33.0167	0.0451	493.324	18.3917	0.147456	0.0501619	0.0103757	0.197618	1.40081	1.20319	0.00843333		0.147967	0.00109524	0.0087619	1.28489	5.66399	0.0153333	0.357419	0.391459
Sep	Spring	2011	30	7.99	448	2.834	113	9.99139	0.283644	2.2	11.3	63	7.17389	1.94946	9.12335	22.4211	13.2978	0.0356093	0.259649	0.22404	0.364607	0.0269009	0.0155625	31.3584	24.3464	0.0231103	260.928	9.51745	0.0333149	0.05725	0.0118419	0.0905649	0.55325	0.462685	0.22656	0.214718	0.199031	0.00125	0.0434	2.56383	7.64279	0.14942	0.703985	0.879981
Sep	Spring	2011	30	10.65	210	1.32844	137	12.1135	0.109666	2.2	11.3	41	2.5753	2.03316	4.60847	35.6943	31.0858	0.0595856	0.431897	0.372312	0.497714	0.0531143	0.112667	58.7315	50.5985	0.122571	568.865	19.0287	0.587893	0.271588	0.0127402	0.859482	1.755	0.895518	0.574752	0.562012	0.137172	0.0532552	0.0107586	7.878	6.48072	0.758886	2.3001	3.09324
Sep	Spring	2011	30	12.53	224	1.417				2.2	11.3	29	6.67274	1.68866	8.36139	44.1336	35.7722	0.0847079	0.384285	0.299577	0.437911	0.07535	0.0685	69.9544	42.3966	0.130786	647.37	23.0471	0.0620385	0.113153	0.0450047	0.175191	2.94	2.76481	0.6426	0.597595	0.163059	0.0326118	0.0197647	10.9373	8.50129	0.2079	1.69218	4.18068
Sep	Spring	2011	30	14.59	283	1.79023	84	7.42723	0.241035	2.2	11.3	44	5.22543	2.15712	7.38255	34.9356	27.553	0.044332	0.308454	0.264122	0.500088	0.0530682	0.0211802	57.8985	34.2037	0.0419368	532.576	18.7485	0.193316	0.399942	0.0133245	0.593258	1.37134	0.778084	0.0108301		0.215195	0.0170187	0.011252	2.39106	15.0018	0.0196911	0.43554	0.612589
Sep	Spring	2011	30	16.82	430	2.72013				2.2	11.3	47	6.7326	2.47942	9.21201	38.8577	29.6457	0.156798	0.227721	0.0709227	0.313674	0.0294698	0.00893023	56.7003	27.5174	0.0156279	523.224	19.8516	0.0481304	0.376467	0.0119405	0.424597	0.712514	0.287916	0.178702	0.166761	0.257125	0.00277292	0.0100833	2.90274	12.9382	0.0873469	0.81192	1.02336
Oct	Spring	2011	27	0.1	1093	6.91419	350	30.9468	0.223422	2.2	15	0	0.457446	4.96767	5.42512	59.9211	54.496	0.800912	6.01682	5.21591	15.8469	0.0230547	0.968295	2408.27	487.973	1.2989	19426.5	706.894	0.0332111	0.410883	0.0125294	0.444094	0.866423	0.422328	0.0101839		0.324032	0.00290968	0.0105806	3.16758	13.37	0.0185161	0.64668	0.855286
Oct	Spring	2011	27	3.545	660	4.17508	243	21.4859	0.194317	2.2	15	11	0.389999	0.618199	1.0082	15.3511	14.3429	0.0726142	0.707741	0.635127	1.07253	0.0201167	0.153833	56.4794	27.4953	0.20448	682.403	18.3277	0.335185	0.285165	0.0124339	0.620349	0.708356		0.168682	0.156249	0.123375	0.005775	0.0105	4.54387	12.3743	0.018375	1.64118	2.15405
Oct	Spring	2011	27	6.09	540	3.41598	224	19.8059	0.172472	2.2	15	53	3.29687	2.23655	5.53342	26.0802	20.5468	0.0171352	0.589541	0.572406	0.359463	0.0456704	0.0677407	88.5656	38.0135	0.118983	707.976	25.377	0.034079	0.0621571	0.0128569	0.0962361	1.47657	1.38034	0.269936	0.257079	0.184571	0.0477714	0.0108571	61.8355	27.1564	0.028215	15.1195	20.5193
Oct	Spring	2011	27	7.99	710	4.49138	281	24.8459	0.18077	2.2	15	63	3.544	0.940672	4.48467	19.5459	15.0612	0.0173713	0.241295	0.223923	0.282592	0.015307	0.00856338	70.5408	25.6794	0.0149859	635.573	20.4817	0.0330073	0.0602025	0.119368	0.0932098	2.67625	2.58304	0.343233	0.223865	0.896465	0.00578365	0.056522	61.1371	33.3375	0.0416423	15.8324	20.8112
Oct	Spring	2011	27	10.65	480	3.03642	450	39.7887	0.0763137	2.2	15	41	1.30305	1.64974	2.95279	20.7252	17.7724	0.0104603	0.20723	0.19677	0.191021	0.0157896	0.00883333	47.6823	20.7142	0.0142106	447.684	14.996	0.867526	0.458476	0.0817712	1.326	1.71371		0.16848	0.0867088	0.114353	0.00524118	0.0222353	14.7595	7.69182	0.0628941	2.72238	4.32378
Oct	Spring	2011	27	12.53	440	2.78339	310	27.41	0.101546	2.2	15	29	0.688292	0.642522	1.33081	15.7357	14.4049	0.01055	0.277162	0.266612	0.307364	0.015925	0.00890909	40.8014	27.5547	0.0143325	352.025	13.105	0.56281	0.0789884	0.0308429	0.641798	3.40788	2.76609	0.34479	0.313947	0.412188	0.0796783	0.0137971	10.2323	19.3711	0.0241449	2.39598	4.1322
Oct	Spring	2011	27	14.59	540	3.41598	305	26.9679	0.126668	2.2	15	44	6.59668	0.853502	7.45018	25.3591	17.9089	0.0103507	0.248521	0.23817	0.350722	0.0312481	0.00874074	92.5863	35.011	0.0627367	747.7	28.464	1.0128	0.0821492	0.0721747	1.09495	2.52367	1.42871	0.0138111		0.61881	0.0118381	0.0143492	6.34594	28.5926	0.0251111	1.17504	2.10761
Oct	Spring	2011	27	16.82	455	2.87828	290	25.6416	0.11225	2.2	15	47	1.44706	0.972577	2.41964	15.5496	13.1299	0.0876141	0.219625	0.132011	0.217538	0.0170923	0.00887912	43.3179	16.9536	0.0164819	336.381	14.4647	0.235947	0.0721218	0.014918	0.308069	3.83128	3.52321	0.252174	0.237256	0.390529	0.103931	0.16692	11.0891	52.2127	0.204224	2.43474	3.83402
Nov	Spring	2011	28	0.1	402	2.54301	107	9.46088	0.268792	3.2	17.7	0	3.57146	4.96435	8.53581	92.2544	83.7186	1.22561	8.1577	6.93209	20.2587	0.0741187	1.10093	3665.85	847.249	1.45059	26690.7	1042.97	0.222937	0.0689313	0.112781	0.291868	1.49783	1.20596	0.110531		0.174586	0.00496667	0.0120404	4.38722	17.0567	0.03427	0.87108	1.31102
Nov	Spring	2011	28	3.545	189	1.19559	50.5	4.46518	0.267759	3.2	17.7	11	2.07156	0.395948	2.4675	56.9048	54.4373	0.327812	1.08605	0.758234	2.95272	0.0236471	0.370513	208.056	63.201	0.513281	1759.79	57.1193	0.56281	0.0789884	0.0308429	0.641798	3.40788	2.76609	0.18295	0.152107	0.124174	0.0056913	0.0241449	16.0271	8.35242	0.0682957	2.72238	4.69512
Nov	Spring	2011	28	6.09	233	1.47393	52	4.59781	0.320572	3.2	17.7	53	2.6842	1.86809	4.55229	31.1907	26.6384	0.179832	0.542631	0.362799	0.838069	0.0480979	0.0425107	166.071	65.8758	0.0324661	1387.57	49.0437	0.0316162	0.0576653	0.0119278	0.0892815	0.799382	0.7101	0.232449	0.220521	0.0579171	0.00415492	0.0100725	5.04508	2.187	0.0199436	1.49226	1.87886
Nov	Spring	2011	28	7.99	540	3.41598	152	13.4398	0.25417	3.2	17.7	63	1.67463	0.521445	2.19608	19.033	16.8369	0.103337	0.249636	0.146298	0.0404259	0.0252389	0.00874074	58.6089	31.1662	0.0152963	583.591	21.2814	0.416069	0.0819865	0.0642397	0.498056	0.816956	0.3189	0.101109	0.0368692	0.227862	0.00424828	0.0102989	3.26731	5.20478	0.0254897	0.81498	1.04917
Nov	Spring	2011	28	10.65	156	0.986838	160	14.1471	0.0697555	3.2	17.7	41	6.7801	3.40478	10.1849	33.7391	23.5542	0.273935	0.413505	0.13957	0.660256	0.0319564	0.0158462	71.2852	57.6972	0.0313754	711.518	28.2382	0.504401	0.0557134	0.0326894	0.560114	1.47799	0.917873	0.186117	0.153427	0.132593	0.00535238	0.0097316	6.24526	13.8906	0.02529	1.5912	1.93562
Nov	Spring	2011	28	12.53	142	0.898276	104	9.19562	0.0976852	3.2	17.7	29	3.11327	3.09548	6.20874	56.6265	50.4177	0.258458	0.526837	0.268379	0.596282	0.0565183	0.0108169	124.11	58.0151	0.0334648	1108.38	37.9474	0.250397	0.051525	0.0316796	0.301922	1.46025	1.15833	0.109012	0.0773329	0.171	0.04455	0.009	4.96687	18.0045	0.022275	1.37394	1.54568
Nov	Spring	2011	28	14.59	195	1.23355	88	7.78091	0.158535	3.2	17.7	44	5.47995	0.796417	6.27637	57.8326	51.5562	0.218102	0.535683	0.317581	1.39462	0.0953615	0.0527692	237.776	127.774	0.0634362	1881.85	68.7251	0.154249	0.0546077	0.022642	0.208856	0.842962	0.634105	0.183639	0.160997	0.0977692	0.00393462	0.00953846	1.74792	8.48327	0.0625604	0.40596	0.484029
Nov	Spring	2011	28	16.82	316	1.99898	109	9.63772	0.207412	3.2	17.7	47	5.68669	2.16236	7.84905	33.4033	25.5542	0.360413	0.752547	0.392134	0.778329	0.0522361	0.00926582	119.738	58.1176	0.016053	872.493	35.2539	0.462141	0.130572	0.0383458	0.592713	1.4018	0.809091	0.1342	0.0958542	0.0741569	0.0434176	0.00956863	7.02098	13.1772	0.0165776	1.64832	1.97152
Dec	Summer	2011	34	0.1	525	3.32109	53	4.68623	0.708691	4.2	19	0	7.94294	43.7713	51.7142	43.9895	-7.72475	1.64256	7.83183	6.18926	18.7696	0.0632211	0.0751579	3077.27	953.776	0.0154737	23262.2	683.831	0.431062	0.181541	0.0331054	0.612603	1.044	0.431397	0.130645	0.0975396	0.087	0.0039875	0.00966667	4.31617	6.36671	0.0562237	1.05978	1.28057
Dec	Summer	2011	34	3.545	313	1.98	77	6.80829	0.290822	4.2	19	11	7.96144	1.51113	9.47257			0.503752	1.10841	0.604662	3.08376	0.114815	0.27254	306.068	118.768	0.307703	2621.62	83.6421	0.416069	0.0819865	0.0642397	0.498056	0.816956	0.3189	0.101109	0.0368692	0.227862	0.00424828	0.0102989	3.26731	5.20478	0.0254897	0.81498	1.04917
Dec	Summer	2011	34	7.99	212.5	1.34425	79	6.98513	0.192444	4.2	19	63	8.48134	4.46915	12.9505	57.6565	44.706	0.171012	0.45108	0.280068	0.956118	0.101912	0.00988235	116.402	51.2054	0.0244588	1026.74	30.1757	0.03742	0.068251	0.0727675	0.105671	1.17219	1.06652	0.25232	0.179553	0.278667	0.0147529	0.0119216	5.45859	13.2329	0.0208627	1.19238	1.77688
Dec	Summer	2011	34	10.65	65	0.411182	104	9.19562	0.044715	4.2	19	41	17.7021	9.84756	27.5496	20.6231	-6.92655	1.74871	1.42745	-0.32126	3.16338	0.130392	0.0424615	226.479	173.908	0.0297762	1952.33	67.5522	0.0365248	0.0666182	0.0896626	0.103143	1.85745	1.75431	0.203258	0.113596	0.318545	0.0576	0.0116364	8.86109	27.4051	0.02592	2.13792	3.1097
Dec	Summer	2011	34	12.53	55	0.347924	95	8.39984	0.0414203	4.2	19	29	19.4289	3.9486	23.3775	32.6436	9.26611	1.14273	1.18199	0.0392642	2.81209	0.2688	0.063	364.216	197.364	0.10017	3209.93	113.571	0.0483616	0.0882074	0.21429	0.136569	1.38147	1.2449	0.218053	0.00376382	0.521926	0.00847407	0.0154074	7.24533	24.2108	0.026963	1.40148	2.69915
Dec	Summer	2011	34	14.59	260	1.64473	80	7.07355	0.232518	4.2	19	44	13.4138	3.0011	16.4149	44.3896	27.9747	0.310102	0.74307	0.432968	1.78369	0.149515	0.0381538	238.318	112.937	0.0696427	1995.76	71.8102	0.0581513	0.106063	0.0805053	0.164215	1.37373	1.20951	0.243297	0.162792	0.490947	0.0382105	0.0185263	6.94042	17.9867	0.0366821	0.79866	1.84953
Dec	Summer	2011	34	16.82	201	1.2715	72	6.3662	0.199727	4.2	19	47	7.38827	3.48831	10.8766	54.6612	43.7846	0.0118301	0.304422	0.292592	1.19131	0.0879124	0.0124876	150.001	71.3115	0.0174826	1203.65	45.8696	0.0463912	0.0846136	0.104726	0.131005	2.22803	2.09703	0.282661	0.177935	0.404593	0.0609661	0.0147797	9.12829	17.7393	0.0258644	1.85844	3.43339

## Sheet: Sea water data
Seawater sampling
	Notes
	1. Samples were collected between August and December 2011
	2. ND stands for Not Detected, meaning that the nutrient was not detected in the sample
	3. DL stands for Detection Limit, meaning that presence of the particular nutrient in the sample was below the machine detection limit
	mg/L
	NO3- N	NH4+ N	PO4+ P	Total P	Si	Mn	Fe	Mg	Ca	Al	Na	K
Aug	0.142821	0.0208322	0.022778	ND	ND	ND	ND	ND	ND	ND	ND	ND
Sep	0.160614	DL	DL	0.24276	0.218	DL	DL	1183.8	329.53	DL	9754.12	321.31
Oct	DL	0.0723424	0.0519164	0.10404	0.769	DL	DL	1271	374.35	DL	10958.2	358.907
Nov	0.417894	DL	0.00894571	0.1377	0.281	DL	DL	727.2	208.54	DL	7015.29	213.251
Dec	DL	0.0731276	0.0143858	0.09282	0.901	DL	DL	1332.8	389.9	DL	11392.8	381.256

## Sheet: Soils data
Soils data
	Notes
	1. 3 replicates of each sample were collected from all points on the ocean-land transect
	Nutrient concentration (mg/g)
Distance (km)	Al	Ca	Fe	K	Mg	Mn	Na	Total P	Total N
0.1	0.383872	62.8505	0.496036	0.178882	1.32179	0.00676852	0.647844	1.64378	0.024
0.1	0.315722	59.8306	0.467599	0.167526	1.30247	0.00552283	0.616716	1.5648	0.156
0.1	0.282476	54.9729	0.399188	0.139547	1.12568	0.00507442	0.566644	1.43775	0.167
3.545	0.285029	57.7162	0.383591	0.130527	1.12413	0.00443971	0.594921	1.5095	0.13
3.545	0.371901	61.0443	0.509955	0.171863	1.48573	0.006574	0.629226	1.59654	0.171
3.545	0.351017	64.8185	0.50359	0.161548	1.50977	0.00698045	0.668129	1.69525	0.242
6.09	0.362709	62.5361	0.437753	0.138541	1.13816	0.00481047	0.644603	1.63556	0.015
6.09	0.364676	58.098	0.451376	0.139435	1.06811	0.00536289	0.598856	1.51949	0.119
6.09	0.35016	64.8444	0.426975	0.14565	1.35076	0.00498803	0.668396	1.69593	0.255
7.99	0.615646	64.8573	0.561764	0.142686	0.919976	0.00698463	0.668529	1.69627	0.219
7.99	0.589209	63.3035	0.531749	0.135372	0.867744	0.0058434	0.652513	1.65563	0.248
7.99	0.528972	56.5512	0.4585	0.122673	0.762137	0.00522011	0.582913	1.47903	0.979
10.65	0.85384	36.6378	0.655295	0.157532	0.483781	0.00838926	0.31786	1.19687	0.223
10.65	0.874622	37.5917	0.678896	0.149395	0.477496	0.00661876	0.32621	1.42209	0.248
10.65	0.840015	38.8216	0.653552	0.148238	0.485736	0.0065262	0.336565	1.35745	0.291
12.53	0.900848	23.4427	0.676129	0.137	0.30751	0.00689927	0.199093	0.973783	0.231
12.53	0.784749	23.0801	0.607143	0.130309	0.307915	0.00675676	0.194015	0.888996	0.163
12.53	0.958358	24.8725	0.717274	0.149432	0.33672	0.00796972	0.210201	1.04901	0.3
14.59	0.37734	62.094	0.518724	0.202522	1.57241	0.00668705	0.640046	1.624	0.007
14.59	0.329394	62.9723	0.475683	0.17826	1.58981	0.00678163	0.649099	1.64697	0.133
14.59	0.320559	59.0265	0.463131	0.17708	1.63912	0.0054486	0.608427	1.54377	0.179
16.82	0.277043	57.3496	0.372331	0.130581	1.43109	0.00529381	0.591142	1.49991	0.118
16.82	0.360723	63.8883	0.529782	0.17987	1.47828	0.00589739	0.658541	1.67093	0.127
16.82	0.327354	58.296	0.471749	0.166816	1.31121	0.00627803	0.600897	1.52466	0.188

## Sheet: Leaf tissue data
Litterfall data
	Notes
	1. Samples were collected on 8 different plants growing in the study site
	2. Nutrients were analysed on both green and senesced tissues
							Green tissue									Senesced tissue
							Nutrient concentration (mg/g)									Nutrient concentration (mg/g)
Month	Year	Distance form the coast (km)	Species name	Species ref	Rep	Litterfal dry wght (g m-2 month-1)	Total N	Al	Ca	Fe	K	Mg	Mn	Na	Total P	Total N	Al	Ca	Fe	K	Mg	Mn	Na	Total P
Jan	2011	3.545	A. imbricata	C	1	2.28	8.55	0.458624	77.1676	0.661302	1.22173	1.87976	0.0101753	2.85232	2.48634	3.592	0.00212191	1.74884	0.0104167	0.274884	0.195795	0.000385802	0.0646219	0.0949074
Jan	2011	3.545	A. imbricata	C	2	2.56	8.417
Jan	2011	3.545	A. imbricata	C	3	3.4	9.112		27.2206	0.0828254	4.24288	2.70236	0.00297897	2.45161	3.26952	5.327	0.000962464	2.01761	0.00596728	0.274302	0.248893	0.000481232	0.0644851	0.163619
Jan	2011	10.65	A. imbricata	B	1	2.2	8.233									8.308
Jan	2011	10.65	A. imbricata	B	2	2.68	8.114	0.123749	17.3761	0.202923	1.74209	0.828329	0.00703372	0.546613	0.677252	6.276	0.00393131	2.91475	0.0132423	0.294848	0.290089	0.000827643	0.0693151	0.172357
Jan	2011	10.65	A. imbricata	B	3	3.04	8.399
Jan	2011	12.53	A. imbricata	C	1	5.2	8.45
Jan	2011	12.53	A. imbricata	C	2	5.04	8.627
Jan	2011	12.53	A. imbricata	C	3	3.88	9.862	0.237673	29.7704	0.297122	3.9587	2.67179	0.011102	2.76584	2.11578	5.478	0.00341155	2.38243	0.0143119	0.237144	0.211766	0.00108171	0.0557497	0.141454
Jan	2011	14.59	A. imbricata	B	1	5.36	9.591	0.0933333	10.3709	0.142079	2.5994	1.33052	0.0201405	1.26707	0.802705	4.487	0.000972006	0.522648	0.00417963	0.277022	0.12082	0.00106921	0.0651244	0.0816485
Jan	2011	14.59	A. imbricata	B	2	6.28	11.431
Jan	2011	14.59	A. imbricata	B	3	7.76	8.649
Jan	2011	16.82	A. imbricata	B	1	6.64	17.65	0.0141685	32.4593	0.0687174	4.93565	4.6438	0.0169775	4.05302	0.504288	5.568	0.00496916	1.54447	0.0210761	0.244174	0.244859	0.00411241	0.0574023	0.119431
Jan	2011	16.82	A. imbricata	B	2	8.16	11.706	0.248676	21.9665	0.25479	1.77023	0.973031	0.00691135	1.5177	0.742247	5.545	0.00197628	1.71473	0.00957738	0.216631	0.210626	0.000684099	0.0509273	0.129219
Jan	2011	16.82	A. imbricata	B	3	7.4	12.194	0.207906	22.3278	0.28107	1.1361	0.879398	0.00698997	0.654913	0.570576	6.25	0.00591668	1.81504	0.0276382	0.230994	0.262522	0.000891555	0.0543038	0.137786
Feb	2011	3.545	A. imbricata	C	1	2.16	8.55	0.458624	77.1676	0.661302	1.22173	1.87976	0.0101753	2.85232	2.48634	3.592	0.00212191	1.74884	0.0104167	0.274884	0.195795	0.000385802	0.0646219	0.0949074
Feb	2011	3.545	A. imbricata	C	2	1.4	8.417
Feb	2011	3.545	A. imbricata	C	3	1.76	9.112		27.2206	0.0828254	4.24288	2.70236	0.00297897	2.45161	3.26952	5.327	0.000962464	2.01761	0.00596728	0.274302	0.248893	0.000481232	0.0644851	0.163619
Feb	2011	10.65	A. imbricata	B	1	3.28	8.233									8.308
Feb	2011	10.65	A. imbricata	B	2	2.72	8.114	0.123749	17.3761	0.202923	1.74209	0.828329	0.00703372	0.546613	0.677252	6.276	0.00393131	2.91475	0.0132423	0.294848	0.290089	0.000827643	0.0693151	0.172357
Feb	2011	10.65	A. imbricata	B	3	2.84	8.399
Feb	2011	12.53	A. imbricata	C	1	4.36	8.45
Feb	2011	12.53	A. imbricata	C	2	3.36	8.627
Feb	2011	12.53	A. imbricata	C	3	3.76	9.862	0.237673	29.7704	0.297122	3.9587	2.67179	0.011102	2.76584	2.11578	5.478	0.00341155	2.38243	0.0143119	0.237144	0.211766	0.00108171	0.0557497	0.141454
Feb	2011	14.59	A. imbricata	B	1	3.64	9.591	0.0933333	10.3709	0.142079	2.5994	1.33052	0.0201405	1.26707	0.802705	4.487	0.000972006	0.522648	0.00417963	0.277022	0.12082	0.00106921	0.0651244	0.0816485
Feb	2011	14.59	A. imbricata	B	2	4.08	11.431
Feb	2011	14.59	A. imbricata	B	3	4.2	8.649
Feb	2011	16.82	A. imbricata	B	1	3.4	17.65	0.0141685	32.4593	0.0687174	4.93565	4.6438	0.0169775	4.05302	0.504288	5.568	0.00496916	1.54447	0.0210761	0.244174	0.244859	0.00411241	0.0574023	0.119431
Feb	2011	16.82	A. imbricata	B	2	4.12	11.706	0.248676	21.9665	0.25479	1.77023	0.973031	0.00691135	1.5177	0.742247	5.545	0.00197628	1.71473	0.00957738	0.216631	0.210626	0.000684099	0.0509273	0.129219
Feb	2011	16.82	A. imbricata	B	3	3.44	12.194	0.207906	22.3278	0.28107	1.1361	0.879398	0.00698997	0.654913	0.570576	6.25	0.00591668	1.81504	0.0276382	0.230994	0.262522	0.000891555	0.0543038	0.137786
Mar	2011	3.545	A. imbricata	C	1	9.16	8.55	0.458624	77.1676	0.661302	1.22173	1.87976	0.0101753	2.85232	2.48634	3.592	0.00212191	1.74884	0.0104167	0.274884	0.195795	0.000385802	0.0646219	0.0949074
Mar	2011	3.545	A. imbricata	C	2	7.56	8.417
Mar	2011	3.545	A. imbricata	C	3	7.16	9.112		27.2206	0.0828254	4.24288	2.70236	0.00297897	2.45161	3.26952	5.327	0.000962464	2.01761	0.00596728	0.274302	0.248893	0.000481232	0.0644851	0.163619
Mar	2011	10.65	A. imbricata	B	1	9.28	8.233									8.308
Mar	2011	10.65	A. imbricata	B	2	8.48	8.114	0.123749	17.3761	0.202923	1.74209	0.828329	0.00703372	0.546613	0.677252	6.276	0.00393131	2.91475	0.0132423	0.294848	0.290089	0.000827643	0.0693151	0.172357
Mar	2011	10.65	A. imbricata	B	3	9.36	8.399
Mar	2011	12.53	A. imbricata	C	1	10.16	8.45
Mar	2011	12.53	A. imbricata	C	2	8.2	8.627
Mar	2011	12.53	A. imbricata	C	3	10.68	9.862	0.237673	29.7704	0.297122	3.9587	2.67179	0.011102	2.76584	2.11578	5.478	0.00341155	2.38243	0.0143119	0.237144	0.211766	0.00108171	0.0557497	0.141454
Mar	2011	14.59	A. imbricata	B	1	10.64	9.591	0.0933333	10.3709	0.142079	2.5994	1.33052	0.0201405	1.26707	0.802705	4.487	0.000972006	0.522648	0.00417963	0.277022	0.12082	0.00106921	0.0651244	0.0816485
Mar	2011	14.59	A. imbricata	B	2	10.12	11.431
Mar	2011	14.59	A. imbricata	B	3	10.6	8.649
Mar	2011	16.82	A. imbricata	B	1	8.28	17.65	0.0141685	32.4593	0.0687174	4.93565	4.6438	0.0169775	4.05302	0.504288	5.568	0.00496916	1.54447	0.0210761	0.244174	0.244859	0.00411241	0.0574023	0.119431
Mar	2011	16.82	A. imbricata	B	2	9.68	11.706	0.248676	21.9665	0.25479	1.77023	0.973031	0.00691135	1.5177	0.742247	5.545	0.00197628	1.71473	0.00957738	0.216631	0.210626	0.000684099	0.0509273	0.129219
Mar	2011	16.82	A. imbricata	B	3	9.24	12.194	0.207906	22.3278	0.28107	1.1361	0.879398	0.00698997	0.654913	0.570576	6.25	0.00591668	1.81504	0.0276382	0.230994	0.262522	0.000891555	0.0543038	0.137786
April	2011	3.545	A. imbricata	C	1	4.08	8.55	0.458624	77.1676	0.661302	1.22173	1.87976	0.0101753	2.85232	2.48634	3.592	0.00212191	1.74884	0.0104167	0.274884	0.195795	0.000385802	0.0646219	0.0949074
April	2011	3.545	A. imbricata	C	2	3.92	8.417
April	2011	3.545	A. imbricata	C	3	3.64	9.112		27.2206	0.0828254	4.24288	2.70236	0.00297897	2.45161	3.26952	5.327	0.000962464	2.01761	0.00596728	0.274302	0.248893	0.000481232	0.0644851	0.163619
April	2011	10.65	A. imbricata	B	1	8.16	8.233									8.308
April	2011	10.65	A. imbricata	B	2	8.8	8.114	0.123749	17.3761	0.202923	1.74209	0.828329	0.00703372	0.546613	0.677252	6.276	0.00393131	2.91475	0.0132423	0.294848	0.290089	0.000827643	0.0693151	0.172357
April	2011	10.65	A. imbricata	B	3	9.68	8.399
April	2011	12.53	A. imbricata	C	1	10.44	8.45
April	2011	12.53	A. imbricata	C	2	8.52	8.627
April	2011	12.53	A. imbricata	C	3	10.08	9.862	0.237673	29.7704	0.297122	3.9587	2.67179	0.011102	2.76584	2.11578	5.478	0.00341155	2.38243	0.0143119	0.237144	0.211766	0.00108171	0.0557497	0.141454
April	2011	14.59	A. imbricata	B	1	9.6	9.591	0.0933333	10.3709	0.142079	2.5994	1.33052	0.0201405	1.26707	0.802705	4.487	0.000972006	0.522648	0.00417963	0.277022	0.12082	0.00106921	0.0651244	0.0816485
April	2011	14.59	A. imbricata	B	2	9.16	11.431
April	2011	14.59	A. imbricata	B	3	10.32	8.649
April	2011	16.82	A. imbricata	B	1	11.32	17.65	0.0141685	32.4593	0.0687174	4.93565	4.6438	0.0169775	4.05302	0.504288	5.568	0.00496916	1.54447	0.0210761	0.244174	0.244859	0.00411241	0.0574023	0.119431
April	2011	16.82	A. imbricata	B	2	11.96	11.706	0.248676	21.9665	0.25479	1.77023	0.973031	0.00691135	1.5177	0.742247	5.545	0.00197628	1.71473	0.00957738	0.216631	0.210626	0.000684099	0.0509273	0.129219
April	2011	16.82	A. imbricata	B	3	11.04	12.194	0.207906	22.3278	0.28107	1.1361	0.879398	0.00698997	0.654913	0.570576	6.25	0.00591668	1.81504	0.0276382	0.230994	0.262522	0.000891555	0.0543038	0.137786
May	2011	3.545	A. imbricata	C	1	13.48	8.55	0.458624	77.1676	0.661302	1.22173	1.87976	0.0101753	2.85232	2.48634	3.592	0.00212191	1.74884	0.0104167	0.274884	0.195795	0.000385802	0.0646219	0.0949074
May	2011	3.545	A. imbricata	C	2	11.76	8.417
May	2011	3.545	A. imbricata	C	3	14	9.112		27.2206	0.0828254	4.24288	2.70236	0.00297897	2.45161	3.26952	5.327	0.000962464	2.01761	0.00596728	0.274302	0.248893	0.000481232	0.0644851	0.163619
May	2011	10.65	A. imbricata	B	1	14.08	8.233									8.308
May	2011	10.65	A. imbricata	B	2	11.44	8.114	0.123749	17.3761	0.202923	1.74209	0.828329	0.00703372	0.546613	0.677252	6.276	0.00393131	2.91475	0.0132423	0.294848	0.290089	0.000827643	0.0693151	0.172357
May	2011	10.65	A. imbricata	B	3	14.2	8.399
May	2011	12.53	A. imbricata	C	1	8.84	8.45
May	2011	12.53	A. imbricata	C	2	7.76	8.627
May	2011	12.53	A. imbricata	C	3	7.96	9.862	0.237673	29.7704	0.297122	3.9587	2.67179	0.011102	2.76584	2.11578	5.478	0.00341155	2.38243	0.0143119	0.237144	0.211766	0.00108171	0.0557497	0.141454
May	2011	14.59	A. imbricata	B	1	5.32	9.591	0.0933333	10.3709	0.142079	2.5994	1.33052	0.0201405	1.26707	0.802705	4.487	0.000972006	0.522648	0.00417963	0.277022	0.12082	0.00106921	0.0651244	0.0816485
May	2011	14.59	A. imbricata	B	2	6.68	11.431
May	2011	14.59	A. imbricata	B	3	5.72	8.649
May	2011	16.82	A. imbricata	B	1	8.8	17.65	0.0141685	32.4593	0.0687174	4.93565	4.6438	0.0169775	4.05302	0.504288	5.568	0.00496916	1.54447	0.0210761	0.244174	0.244859	0.00411241	0.0574023	0.119431
May	2011	16.82	A. imbricata	B	2	6.08	11.706	0.248676	21.9665	0.25479	1.77023	0.973031	0.00691135	1.5177	0.742247	5.545	0.00197628	1.71473	0.00957738	0.216631	0.210626	0.000684099	0.0509273	0.129219
May	2011	16.82	A. imbricata	B	3	9.48	12.194	0.207906	22.3278	0.28107	1.1361	0.879398	0.00698997	0.654913	0.570576	6.25	0.00591668	1.81504	0.0276382	0.230994	0.262522	0.000891555	0.0543038	0.137786
June	2011	3.545	A. imbricata	C	1	36.24	8.55	0.458624	77.1676	0.661302	1.22173	1.87976	0.0101753	2.85232	2.48634	3.592	0.00212191	1.74884	0.0104167	0.274884	0.195795	0.000385802	0.0646219	0.0949074
June	2011	3.545	A. imbricata	C	2	25.52	8.417
June	2011	3.545	A. imbricata	C	3	31.88	9.112		27.2206	0.0828254	4.24288	2.70236	0.00297897	2.45161	3.26952	5.327	0.000962464	2.01761	0.00596728	0.274302	0.248893	0.000481232	0.0644851	0.163619
June	2011	10.65	A. imbricata	B	1	23.56	8.233									8.308
June	2011	10.65	A. imbricata	B	2	20.2	8.114	0.123749	17.3761	0.202923	1.74209	0.828329	0.00703372	0.546613	0.677252	6.276	0.00393131	2.91475	0.0132423	0.294848	0.290089	0.000827643	0.0693151	0.172357
June	2011	10.65	A. imbricata	B	3	23.12	8.399
June	2011	12.53	A. imbricata	C	1	28.16	8.45
June	2011	12.53	A. imbricata	C	2	24.64	8.627
June	2011	12.53	A. imbricata	C	3	25	9.862	0.237673	29.7704	0.297122	3.9587	2.67179	0.011102	2.76584	2.11578	5.478	0.00341155	2.38243	0.0143119	0.237144	0.211766	0.00108171	0.0557497	0.141454
June	2011	14.59	A. imbricata	B	1	14.68	9.591	0.0933333	10.3709	0.142079	2.5994	1.33052	0.0201405	1.26707	0.802705	4.487	0.000972006	0.522648	0.00417963	0.277022	0.12082	0.00106921	0.0651244	0.0816485
June	2011	14.59	A. imbricata	B	2	22.56	11.431
June	2011	14.59	A. imbricata	B	3	18.2	8.649
June	2011	16.82	A. imbricata	B	1	23.24	17.65	0.0141685	32.4593	0.0687174	4.93565	4.6438	0.0169775	4.05302	0.504288	5.568	0.00496916	1.54447	0.0210761	0.244174	0.244859	0.00411241	0.0574023	0.119431
June	2011	16.82	A. imbricata	B	2	23.88	11.706	0.248676	21.9665	0.25479	1.77023	0.973031	0.00691135	1.5177	0.742247	5.545	0.00197628	1.71473	0.00957738	0.216631	0.210626	0.000684099	0.0509273	0.129219
June	2011	16.82	A. imbricata	B	3	21.24	12.194	0.207906	22.3278	0.28107	1.1361	0.879398	0.00698997	0.654913	0.570576	6.25	0.00591668	1.81504	0.0276382	0.230994	0.262522	0.000891555	0.0543038	0.137786
July	2011	3.545	A. imbricata	C	1	21.56	8.55	0.458624	77.1676	0.661302	1.22173	1.87976	0.0101753	2.85232	2.48634	3.592	0.00212191	1.74884	0.0104167	0.274884	0.195795	0.000385802	0.0646219	0.0949074
July	2011	3.545	A. imbricata	C	2	23.56	8.417
July	2011	3.545	A. imbricata	C	3	31.12	9.112		27.2206	0.0828254	4.24288	2.70236	0.00297897	2.45161	3.26952	5.327	0.000962464	2.01761	0.00596728	0.274302	0.248893	0.000481232	0.0644851	0.163619
July	2011	10.65	A. imbricata	B	1	14.2	8.233									8.308
July	2011	10.65	A. imbricata	B	2	22.6	8.114	0.123749	17.3761	0.202923	1.74209	0.828329	0.00703372	0.546613	0.677252	6.276	0.00393131	2.91475	0.0132423	0.294848	0.290089	0.000827643	0.0693151	0.172357
July	2011	10.65	A. imbricata	B	3	17.68	8.399
July	2011	12.53	A. imbricata	C	1	9.36	8.45
July	2011	12.53	A. imbricata	C	2	9.72	8.627
July	2011	12.53	A. imbricata	C	3	9.44	9.862	0.237673	29.7704	0.297122	3.9587	2.67179	0.011102	2.76584	2.11578	5.478	0.00341155	2.38243	0.0143119	0.237144	0.211766	0.00108171	0.0557497	0.141454
July	2011	14.59	A. imbricata	B	1	24.04	9.591	0.0933333	10.3709	0.142079	2.5994	1.33052	0.0201405	1.26707	0.802705	4.487	0.000972006	0.522648	0.00417963	0.277022	0.12082	0.00106921	0.0651244	0.0816485
July	2011	14.59	A. imbricata	B	2	19.96	11.431
July	2011	14.59	A. imbricata	B	3	16.32	8.649
July	2011	16.82	A. imbricata	B	1	14.68	17.65	0.0141685	32.4593	0.0687174	4.93565	4.6438	0.0169775	4.05302	0.504288	5.568	0.00496916	1.54447	0.0210761	0.244174	0.244859	0.00411241	0.0574023	0.119431
July	2011	16.82	A. imbricata	B	2	17.96	11.706	0.248676	21.9665	0.25479	1.77023	0.973031	0.00691135	1.5177	0.742247	5.545	0.00197628	1.71473	0.00957738	0.216631	0.210626	0.000684099	0.0509273	0.129219
July	2011	16.82	A. imbricata	B	3	23.32	12.194	0.207906	22.3278	0.28107	1.1361	0.879398	0.00698997	0.654913	0.570576	6.25	0.00591668	1.81504	0.0276382	0.230994	0.262522	0.000891555	0.0543038	0.137786
Aug	2011	3.545	A. imbricata	C	1	18.12	8.55	0.458624	77.1676	0.661302	1.22173	1.87976	0.0101753	2.85232	2.48634	3.592	0.00212191	1.74884	0.0104167	0.274884	0.195795	0.000385802	0.0646219	0.0949074
Aug	2011	3.545	A. imbricata	C	2	19.12	8.417
Aug	2011	3.545	A. imbricata	C	3	18.32	9.112		27.2206	0.0828254	4.24288	2.70236	0.00297897	2.45161	3.26952	5.327	0.000962464	2.01761	0.00596728	0.274302	0.248893	0.000481232	0.0644851	0.163619
Aug	2011	10.65	A. imbricata	B	1	21.24	8.233									8.308
Aug	2011	10.65	A. imbricata	B	2	19.68	8.114	0.123749	17.3761	0.202923	1.74209	0.828329	0.00703372	0.546613	0.677252	6.276	0.00393131	2.91475	0.0132423	0.294848	0.290089	0.000827643	0.0693151	0.172357
Aug	2011	10.65	A. imbricata	B	3	19.92	8.399
Aug	2011	12.53	A. imbricata	C	1	15.84	8.45
Aug	2011	12.53	A. imbricata	C	2	16.12	8.627
Aug	2011	12.53	A. imbricata	C	3	15.88	9.862	0.237673	29.7704	0.297122	3.9587	2.67179	0.011102	2.76584	2.11578	5.478	0.00341155	2.38243	0.0143119	0.237144	0.211766	0.00108171	0.0557497	0.141454
Aug	2011	14.59	A. imbricata	B	1	23.92	9.591	0.0933333	10.3709	0.142079	2.5994	1.33052	0.0201405	1.26707	0.802705	4.487	0.000972006	0.522648	0.00417963	0.277022	0.12082	0.00106921	0.0651244	0.0816485
Aug	2011	14.59	A. imbricata	B	2	17.96	11.431
Aug	2011	14.59	A. imbricata	B	3	22	8.649
Aug	2011	16.82	A. imbricata	B	1	14.68	17.65	0.0141685	32.4593	0.0687174	4.93565	4.6438	0.0169775	4.05302	0.504288	5.568	0.00496916	1.54447	0.0210761	0.244174	0.244859	0.00411241	0.0574023	0.119431
Aug	2011	16.82	A. imbricata	B	2	15.88	11.706	0.248676	21.9665	0.25479	1.77023	0.973031	0.00691135	1.5177	0.742247	5.545	0.00197628	1.71473	0.00957738	0.216631	0.210626	0.000684099	0.0509273	0.129219
Aug	2011	16.82	A. imbricata	B	3	14.56	12.194	0.207906	22.3278	0.28107	1.1361	0.879398	0.00698997	0.654913	0.570576	6.25	0.00591668	1.81504	0.0276382	0.230994	0.262522	0.000891555	0.0543038	0.137786
Sep	2011	3.545	A. imbricata	C	1	23.56	8.55	0.458624	77.1676	0.661302	1.22173	1.87976	0.0101753	2.85232	2.48634	3.592	0.00212191	1.74884	0.0104167	0.274884	0.195795	0.000385802	0.0646219	0.0949074
Sep	2011	3.545	A. imbricata	C	2	22.36	8.417
Sep	2011	3.545	A. imbricata	C	3	23.88	9.112		27.2206	0.0828254	4.24288	2.70236	0.00297897	2.45161	3.26952	5.327	0.000962464	2.01761	0.00596728	0.274302	0.248893	0.000481232	0.0644851	0.163619
Sep	2011	10.65	A. imbricata	B	1	14.04	8.233									8.308
Sep	2011	10.65	A. imbricata	B	2	11.72	8.114	0.123749	17.3761	0.202923	1.74209	0.828329	0.00703372	0.546613	0.677252	6.276	0.00393131	2.91475	0.0132423	0.294848	0.290089	0.000827643	0.0693151	0.172357
Sep	2011	10.65	A. imbricata	B	3	9.24	8.399
Sep	2011	12.53	A. imbricata	B	1	14.68	5.609		19.4383	0.0436443	3.11317	1.35995	0.0085834	5.25168	2.54149	5.099	0.000875044	1.37181	0.00306265	0.249387	0.198722	0.000525026	0.0586279	0.148757
Sep	2011	12.53	A. imbricata	B	2	10.6	4.707	0.0148893	25.6438	0.0834059	6.48126	6.18351	0.0125753	2.90713	2.15373	2.298	0.000871536	1.08314	0.00444483	0.248388	0.0881123	0.000610075	0.0583929	0.133345
Sep	2011	12.53	A. imbricata	B	3	16.96	7.173		30.8122	0.0652832	10.1256	8.94541	0.0147405	4.1668	3.05478	3.817	0.000865951	1.51186	0.00935227	0.246796	0.595428	0.000779356	0.0580187	0.147212
Sep	2011	12.53	A. imbricata	C	1	10.2	8.45
Sep	2011	12.53	A. imbricata	C	2	8.32	8.627
Sep	2011	12.53	A. imbricata	C	3	7.84	9.862	0.237673	29.7704	0.297122	3.9587	2.67179	0.011102	2.76584	2.11578	5.478	0.00341155	2.38243	0.0143119	0.237144	0.211766	0.00108171	0.0557497	0.141454
Sep	2011	14.59	A. imbricata	B	1	9.48	9.591	0.0933333	10.3709	0.142079	2.5994	1.33052	0.0201405	1.26707	0.802705	4.487	0.000972006	0.522648	0.00417963	0.277022	0.12082	0.00106921	0.0651244	0.0816485
Sep	2011	14.59	A. imbricata	B	2	9.4	11.431
Sep	2011	14.59	A. imbricata	B	3	10.72	8.649
Sep	2011	16.82	A. imbricata	B	1	7.92	17.65	0.0141685	32.4593	0.0687174	4.93565	4.6438	0.0169775	4.05302	0.504288	5.568	0.00496916	1.54447	0.0210761	0.244174	0.244859	0.00411241	0.0574023	0.119431
Sep	2011	16.82	A. imbricata	B	2	9.64	11.706	0.248676	21.9665	0.25479	1.77023	0.973031	0.00691135	1.5177	0.742247	5.545	0.00197628	1.71473	0.00957738	0.216631	0.210626	0.000684099	0.0509273	0.129219
Sep	2011	16.82	A. imbricata	B	3	8.76	12.194	0.207906	22.3278	0.28107	1.1361	0.879398	0.00698997	0.654913	0.570576	6.25	0.00591668	1.81504	0.0276382	0.230994	0.262522	0.000891555	0.0543038	0.137786
Oct	2011	3.545	A. imbricata	C	1	12.08	8.55	0.458624	77.1676	0.661302	1.22173	1.87976	0.0101753	2.85232	2.48634	3.592	0.00212191	1.74884	0.0104167	0.274884	0.195795	0.000385802	0.0646219	0.0949074
Oct	2011	3.545	A. imbricata	C	2	11.8	8.417
Oct	2011	3.545	A. imbricata	C	3	14	9.112		27.2206	0.0828254	4.24288	2.70236	0.00297897	2.45161	3.26952	5.327	0.000962464	2.01761	0.00596728	0.274302	0.248893	0.000481232	0.0644851	0.163619
Oct	2011	10.65	A. imbricata	B	1	13.56	8.233									8.308
Oct	2011	10.65	A. imbricata	B	2	11.4	8.114	0.123749	17.3761	0.202923	1.74209	0.828329	0.00703372	0.546613	0.677252	6.276	0.00393131	2.91475	0.0132423	0.294848	0.290089	0.000827643	0.0693151	0.172357
Oct	2011	10.65	A. imbricata	B	3	14.2	8.399
Oct	2011	12.53	A. imbricata	B	1	13.08	5.609		19.4383	0.0436443	3.11317	1.35995	0.0085834	5.25168	2.54149	5.099	0.000875044	1.37181	0.00306265	0.249387	0.198722	0.000525026	0.0586279	0.148757
Oct	2011	12.53	A. imbricata	B	2	15.92	4.707	0.0148893	25.6438	0.0834059	6.48126	6.18351	0.0125753	2.90713	2.15373	2.298	0.000871536	1.08314	0.00444483	0.248388	0.0881123	0.000610075	0.0583929	0.133345
Oct	2011	12.53	A. imbricata	B	3	15.84	7.173		30.8122	0.0652832	10.1256	8.94541	0.0147405	4.1668	3.05478	3.817	0.000865951	1.51186	0.00935227	0.246796	0.595428	0.000779356	0.0580187	0.147212
Oct	2011	12.53	A. imbricata	C	1	9.28	8.45
Oct	2011	12.53	A. imbricata	C	2	11.92	8.627
Oct	2011	12.53	A. imbricata	C	3	11.08	9.862	0.237673	29.7704	0.297122	3.9587	2.67179	0.011102	2.76584	2.11578	5.478	0.00341155	2.38243	0.0143119	0.237144	0.211766	0.00108171	0.0557497	0.141454
Oct	2011	14.59	A. imbricata	B	1	9.36	9.591	0.0933333	10.3709	0.142079	2.5994	1.33052	0.0201405	1.26707	0.802705	4.487	0.000972006	0.522648	0.00417963	0.277022	0.12082	0.00106921	0.0651244	0.0816485
Oct	2011	14.59	A. imbricata	B	2	14.08	11.431
Oct	2011	14.59	A. imbricata	B	3	11.64	8.649
Oct	2011	16.82	A. imbricata	B	1	8.8	17.65	0.0141685	32.4593	0.0687174	4.93565	4.6438	0.0169775	4.05302	0.504288	5.568	0.00496916	1.54447	0.0210761	0.244174	0.244859	0.00411241	0.0574023	0.119431
Oct	2011	16.82	A. imbricata	B	2	10.04	11.706	0.248676	21.9665	0.25479	1.77023	0.973031	0.00691135	1.5177	0.742247	5.545	0.00197628	1.71473	0.00957738	0.216631	0.210626	0.000684099	0.0509273	0.129219
Oct	2011	16.82	A. imbricata	B	3	9.48	12.194	0.207906	22.3278	0.28107	1.1361	0.879398	0.00698997	0.654913	0.570576	6.25	0.00591668	1.81504	0.0276382	0.230994	0.262522	0.000891555	0.0543038	0.137786
Nov	2011	3.545	A. imbricata	C	1	3.52	8.55	0.458624	77.1676	0.661302	1.22173	1.87976	0.0101753	2.85232	2.48634	3.592	0.00212191	1.74884	0.0104167	0.274884	0.195795	0.000385802	0.0646219	0.0949074
Nov	2011	3.545	A. imbricata	C	2	3.96	8.417
Nov	2011	3.545	A. imbricata	C	3	4.32	9.112		27.2206	0.0828254	4.24288	2.70236	0.00297897	2.45161	3.26952	5.327	0.000962464	2.01761	0.00596728	0.274302	0.248893	0.000481232	0.0644851	0.163619
Nov	2011	10.65	A. imbricata	B	1	2.56	8.233									8.308
Nov	2011	10.65	A. imbricata	B	2	2.16	8.114	0.123749	17.3761	0.202923	1.74209	0.828329	0.00703372	0.546613	0.677252	6.276	0.00393131	2.91475	0.0132423	0.294848	0.290089	0.000827643	0.0693151	0.172357
Nov	2011	10.65	A. imbricata	B	3	1.84	8.399
Nov	2011	12.53	A. imbricata	B	1	3.76	5.609		19.4383	0.0436443	3.11317	1.35995	0.0085834	5.25168	2.54149	5.099	0.000875044	1.37181	0.00306265	0.249387	0.198722	0.000525026	0.0586279	0.148757
Nov	2011	12.53	A. imbricata	B	2	3.36	4.707	0.0148893	25.6438	0.0834059	6.48126	6.18351	0.0125753	2.90713	2.15373	2.298	0.000871536	1.08314	0.00444483	0.248388	0.0881123	0.000610075	0.0583929	0.133345
Nov	2011	12.53	A. imbricata	B	3	3.52	7.173		30.8122	0.0652832	10.1256	8.94541	0.0147405	4.1668	3.05478	3.817	0.000865951	1.51186	0.00935227	0.246796	0.595428	0.000779356	0.0580187	0.147212
Nov	2011	12.53	A. imbricata	C	1	5.24	8.45
Nov	2011	12.53	A. imbricata	C	2	6	8.627
Nov	2011	12.53	A. imbricata	C	3	5.72	9.862	0.237673	29.7704	0.297122	3.9587	2.67179	0.011102	2.76584	2.11578	5.478	0.00341155	2.38243	0.0143119	0.237144	0.211766	0.00108171	0.0557497	0.141454
Nov	2011	14.59	A. imbricata	B	1	2.56	9.591	0.0933333	10.3709	0.142079	2.5994	1.33052	0.0201405	1.26707	0.802705	4.487	0.000972006	0.522648	0.00417963	0.277022	0.12082	0.00106921	0.0651244	0.0816485
Nov	2011	14.59	A. imbricata	B	2	1.6	11.431
Nov	2011	14.59	A. imbricata	B	3	2.2	8.649
Nov	2011	16.82	A. imbricata	B	1	10.88	17.65	0.0141685	32.4593	0.0687174	4.93565	4.6438	0.0169775	4.05302	0.504288	5.568	0.00496916	1.54447	0.0210761	0.244174	0.244859	0.00411241	0.0574023	0.119431
Nov	2011	16.82	A. imbricata	B	2	10.04	11.706	0.248676	21.9665	0.25479	1.77023	0.973031	0.00691135	1.5177	0.742247	5.545	0.00197628	1.71473	0.00957738	0.216631	0.210626	0.000684099	0.0509273	0.129219
Nov	2011	16.82	A. imbricata	B	3	10.68	12.194	0.207906	22.3278	0.28107	1.1361	0.879398	0.00698997	0.654913	0.570576	6.25	0.00591668	1.81504	0.0276382	0.230994	0.262522	0.000891555	0.0543038	0.137786
Dec	2011	3.545	A. imbricata	C	1	12.88	8.55	0.458624	77.1676	0.661302	1.22173	1.87976	0.0101753	2.85232	2.48634	3.592	0.00212191	1.74884	0.0104167	0.274884	0.195795	0.000385802	0.0646219	0.0949074
Dec	2011	3.545	A. imbricata	C	2	10.72	8.417
Dec	2011	3.545	A. imbricata	C	3	13.96	9.112		27.2206	0.0828254	4.24288	2.70236	0.00297897	2.45161	3.26952	5.327	0.000962464	2.01761	0.00596728	0.274302	0.248893	0.000481232	0.0644851	0.163619
Dec	2011	10.65	A. imbricata	B	1	19.12	8.233									8.308
Dec	2011	10.65	A. imbricata	B	2	15.56	8.114	0.123749	17.3761	0.202923	1.74209	0.828329	0.00703372	0.546613	0.677252	6.276	0.00393131	2.91475	0.0132423	0.294848	0.290089	0.000827643	0.0693151	0.172357
Dec	2011	10.65	A. imbricata	B	3	17.08	8.399
Dec	2011	12.53	A. imbricata	B	1	16.72	5.609		19.4383	0.0436443	3.11317	1.35995	0.0085834	5.25168	2.54149	5.099	0.000875044	1.37181	0.00306265	0.249387	0.198722	0.000525026	0.0586279	0.148757
Dec	2011	12.53	A. imbricata	B	2	15.92	4.707	0.0148893	25.6438	0.0834059	6.48126	6.18351	0.0125753	2.90713	2.15373	2.298	0.000871536	1.08314	0.00444483	0.248388	0.0881123	0.000610075	0.0583929	0.133345
Dec	2011	12.53	A. imbricata	B	3	15.76	7.173		30.8122	0.0652832	10.1256	8.94541	0.0147405	4.1668	3.05478	3.817	0.000865951	1.51186	0.00935227	0.246796	0.595428	0.000779356	0.0580187	0.147212
Dec	2011	12.53	A. imbricata	C	1	14.68	8.45
Dec	2011	12.53	A. imbricata	C	2	15.92	8.627
Dec	2011	12.53	A. imbricata	C	3	15.4	9.862	0.237673	29.7704	0.297122	3.9587	2.67179	0.011102	2.76584	2.11578	5.478	0.00341155	2.38243	0.0143119	0.237144	0.211766	0.00108171	0.0557497	0.141454
Dec	2011	14.59	A. imbricata	B	1	4.8	9.591	0.0933333	10.3709	0.142079	2.5994	1.33052	0.0201405	1.26707	0.802705	4.487	0.000972006	0.522648	0.00417963	0.277022	0.12082	0.00106921	0.0651244	0.0816485
Dec	2011	14.59	A. imbricata	B	2	3.36	11.431
Dec	2011	14.59	A. imbricata	B	3	2.2	8.649
Jan	2011	0.1	C. monelifera	B	1	17.64	10.938		20.989	0.100746	1.21578	5.5621	0.00312457	22.1049	0.596381	5.042	0.00119119	2.68066	0.00555886	0.282906	0.492456	0.000496327	0.0665078	0.116637
Jan	2011	0.1	C. monelifera	B	2	23.92	11.587	0.0331271	21.2798	0.184089	2.80718	8.40377	0.00567751	41.0558	0.698463	5.317	0.00175644	2.71936	0.00790398	0.278103	0.712822	0.00068306	0.0653786	0.129977
Jan	2011	0.1	C. monelifera	B	3	21.28	19.608		25.1429	0.211656	1.84797	4.64812	0.00483775	18.6668	0.862924	11.667	0.00119856	2.51139	0.00799041	0.284658	0.703755	0.000898921	0.0669197	0.169796
Feb	2011	0.1	C. monelifera	B	1	10	10.938		20.989	0.100746	1.21578	5.5621	0.00312457	22.1049	0.596381	5.042	0.00119119	2.68066	0.00555886	0.282906	0.492456	0.000496327	0.0665078	0.116637
Feb	2011	0.1	C. monelifera	B	2	14.36	11.587	0.0331271	21.2798	0.184089	2.80718	8.40377	0.00567751	41.0558	0.698463	5.317	0.00175644	2.71936	0.00790398	0.278103	0.712822	0.00068306	0.0653786	0.129977
Feb	2011	0.1	C. monelifera	B	3	21.68	19.608		25.1429	0.211656	1.84797	4.64812	0.00483775	18.6668	0.862924	11.667	0.00119856	2.51139	0.00799041	0.284658	0.703755	0.000898921	0.0669197	0.169796
Mar	2011	0.1	C. monelifera	B	1	24.28	10.938		20.989	0.100746	1.21578	5.5621	0.00312457	22.1049	0.596381	5.042	0.00119119	2.68066	0.00555886	0.282906	0.492456	0.000496327	0.0665078	0.116637
Mar	2011	0.1	C. monelifera	B	2	22.08	11.587	0.0331271	21.2798	0.184089	2.80718	8.40377	0.00567751	41.0558	0.698463	5.317	0.00175644	2.71936	0.00790398	0.278103	0.712822	0.00068306	0.0653786	0.129977
Mar	2011	0.1	C. monelifera	B	3	24.64	19.608		25.1429	0.211656	1.84797	4.64812	0.00483775	18.6668	0.862924	11.667	0.00119856	2.51139	0.00799041	0.284658	0.703755	0.000898921	0.0669197	0.169796
April	2011	0.1	C. monelifera	B	1	22.64	10.938		20.989	0.100746	1.21578	5.5621	0.00312457	22.1049	0.596381	5.042	0.00119119	2.68066	0.00555886	0.282906	0.492456	0.000496327	0.0665078	0.116637
April	2011	0.1	C. monelifera	B	2	26.04	11.587	0.0331271	21.2798	0.184089	2.80718	8.40377	0.00567751	41.0558	0.698463	5.317	0.00175644	2.71936	0.00790398	0.278103	0.712822	0.00068306	0.0653786	0.129977
April	2011	0.1	C. monelifera	B	3	24.68	19.608		25.1429	0.211656	1.84797	4.64812	0.00483775	18.6668	0.862924	11.667	0.00119856	2.51139	0.00799041	0.284658	0.703755	0.000898921	0.0669197	0.169796
May	2011	0.1	C. monelifera	B	1	22.08	10.938		20.989	0.100746	1.21578	5.5621	0.00312457	22.1049	0.596381	5.042	0.00119119	2.68066	0.00555886	0.282906	0.492456	0.000496327	0.0665078	0.116637
May	2011	0.1	C. monelifera	B	2	22.04	11.587	0.0331271	21.2798	0.184089	2.80718	8.40377	0.00567751	41.0558	0.698463	5.317	0.00175644	2.71936	0.00790398	0.278103	0.712822	0.00068306	0.0653786	0.129977
May	2011	0.1	C. monelifera	B	3	18.88	19.608		25.1429	0.211656	1.84797	4.64812	0.00483775	18.6668	0.862924	11.667	0.00119856	2.51139	0.00799041	0.284658	0.703755	0.000898921	0.0669197	0.169796
June	2011	0.1	C. monelifera	B	1	37.52	10.938		20.989	0.100746	1.21578	5.5621	0.00312457	22.1049	0.596381	5.042	0.00119119	2.68066	0.00555886	0.282906	0.492456	0.000496327	0.0665078	0.116637
June	2011	0.1	C. monelifera	B	2	33.28	11.587	0.0331271	21.2798	0.184089	2.80718	8.40377	0.00567751	41.0558	0.698463	5.317	0.00175644	2.71936	0.00790398	0.278103	0.712822	0.00068306	0.0653786	0.129977
June	2011	0.1	C. monelifera	B	3	39.84	19.608		25.1429	0.211656	1.84797	4.64812	0.00483775	18.6668	0.862924	11.667	0.00119856	2.51139	0.00799041	0.284658	0.703755	0.000898921	0.0669197	0.169796
July	2011	0.1	C. monelifera	B	1	45.28	10.938		20.989	0.100746	1.21578	5.5621	0.00312457	22.1049	0.596381	5.042	0.00119119	2.68066	0.00555886	0.282906	0.492456	0.000496327	0.0665078	0.116637
July	2011	0.1	C. monelifera	B	2	37.36	11.587	0.0331271	21.2798	0.184089	2.80718	8.40377	0.00567751	41.0558	0.698463	5.317	0.00175644	2.71936	0.00790398	0.278103	0.712822	0.00068306	0.0653786	0.129977
July	2011	0.1	C. monelifera	B	3	56.36	19.608		25.1429	0.211656	1.84797	4.64812	0.00483775	18.6668	0.862924	11.667	0.00119856	2.51139	0.00799041	0.284658	0.703755	0.000898921	0.0669197	0.169796
Aug	2011	0.1	C. monelifera	B	1	41.36	10.938		20.989	0.100746	1.21578	5.5621	0.00312457	22.1049	0.596381	5.042	0.00119119	2.68066	0.00555886	0.282906	0.492456	0.000496327	0.0665078	0.116637
Aug	2011	0.1	C. monelifera	B	2	39.12	11.587	0.0331271	21.2798	0.184089	2.80718	8.40377	0.00567751	41.0558	0.698463	5.317	0.00175644	2.71936	0.00790398	0.278103	0.712822	0.00068306	0.0653786	0.129977
Aug	2011	0.1	C. monelifera	B	3	41.76	19.608		25.1429	0.211656	1.84797	4.64812	0.00483775	18.6668	0.862924	11.667	0.00119856	2.51139	0.00799041	0.284658	0.703755	0.000898921	0.0669197	0.169796
Sep	2011	0.1	C. monelifera	B	1	23.12	10.938		20.989	0.100746	1.21578	5.5621	0.00312457	22.1049	0.596381	5.042	0.00119119	2.68066	0.00555886	0.282906	0.492456	0.000496327	0.0665078	0.116637
Sep	2011	0.1	C. monelifera	B	2	24.92	11.587	0.0331271	21.2798	0.184089	2.80718	8.40377	0.00567751	41.0558	0.698463	5.317	0.00175644	2.71936	0.00790398	0.278103	0.712822	0.00068306	0.0653786	0.129977
Sep	2011	0.1	C. monelifera	B	3	23.92	19.608		25.1429	0.211656	1.84797	4.64812	0.00483775	18.6668	0.862924	11.667	0.00119856	2.51139	0.00799041	0.284658	0.703755	0.000898921	0.0669197	0.169796
Oct	2011	0.1	C. monelifera	B	1	21.24	10.938		20.989	0.100746	1.21578	5.5621	0.00312457	22.1049	0.596381	5.042	0.00119119	2.68066	0.00555886	0.282906	0.492456	0.000496327	0.0665078	0.116637
Oct	2011	0.1	C. monelifera	B	2	27.56	11.587	0.0331271	21.2798	0.184089	2.80718	8.40377	0.00567751	41.0558	0.698463	5.317	0.00175644	2.71936	0.00790398	0.278103	0.712822	0.00068306	0.0653786	0.129977
Oct	2011	0.1	C. monelifera	B	3	20.04	19.608		25.1429	0.211656	1.84797	4.64812	0.00483775	18.6668	0.862924	11.667	0.00119856	2.51139	0.00799041	0.284658	0.703755	0.000898921	0.0669197	0.169796
Nov	2011	0.1	C. monelifera	B	1	17.24	10.938		20.989	0.100746	1.21578	5.5621	0.00312457	22.1049	0.596381	5.042	0.00119119	2.68066	0.00555886	0.282906	0.492456	0.000496327	0.0665078	0.116637
Nov	2011	0.1	C. monelifera	B	2	31.92	11.587	0.0331271	21.2798	0.184089	2.80718	8.40377	0.00567751	41.0558	0.698463	5.317	0.00175644	2.71936	0.00790398	0.278103	0.712822	0.00068306	0.0653786	0.129977
Nov	2011	0.1	C. monelifera	B	3	27.56	19.608		25.1429	0.211656	1.84797	4.64812	0.00483775	18.6668	0.862924	11.667	0.00119856	2.51139	0.00799041	0.284658	0.703755	0.000898921	0.0669197	0.169796
Dec	2011	0.1	C. monelifera	B	1	31.56	10.938		20.989	0.100746	1.21578	5.5621	0.00312457	22.1049	0.596381	5.042	0.00119119	2.68066	0.00555886	0.282906	0.492456	0.000496327	0.0665078	0.116637
Dec	2011	0.1	C. monelifera	B	2	28.12	11.587	0.0331271	21.2798	0.184089	2.80718	8.40377	0.00567751	41.0558	0.698463	5.317	0.00175644	2.71936	0.00790398	0.278103	0.712822	0.00068306	0.0653786	0.129977
Dec	2011	0.1	C. monelifera	B	3	24.64	19.608		25.1429	0.211656	1.84797	4.64812	0.00483775	18.6668	0.862924	11.667	0.00119856	2.51139	0.00799041	0.284658	0.703755	0.000898921	0.0669197	0.169796
Jan	2011	14.59	M. cordfolia	C	1	8.4	16.405	0.106139	32.6711	0.180978	1.00257	2.10742	0.0940139	2.49656	0.235207	10.374	0.00155146	1.37545	0.0129288	0.245647	0.255042	0.00336149	0.0577487	0.104379
Jan	2011	14.59	M. cordfolia	C	2	12.84	15.879	0.181535	24.4978	0.259032	2.66922	2.38271	0.0567369	5.16833	0.945656	10.332	0.00440457	1.82651	0.0196574	0.232463	0.194209	0.00497553	0.0546493	0.103752
Jan	2011	14.59	M. cordfolia	C	3	12.4	15.782	0.116164	35.5394	0.204971	1.32025	2.42696	0.0994741	4.17891	0.293275	11.004	0.00392396	1.60708	0.0184862	0.248518	0.241629	0.00427276	0.0584234	0.0824904
Feb	2011	14.59	M. cordfolia	C	1	13.72	16.405	0.106139	32.6711	0.180978	1.00257	2.10742	0.0940139	2.49656	0.235207	10.374	0.00155146	1.37545	0.0129288	0.245647	0.255042	0.00336149	0.0577487	0.104379
Feb	2011	14.59	M. cordfolia	C	2	8.44	15.879	0.181535	24.4978	0.259032	2.66922	2.38271	0.0567369	5.16833	0.945656	10.332	0.00440457	1.82651	0.0196574	0.232463	0.194209	0.00497553	0.0546493	0.103752
Feb	2011	14.59	M. cordfolia	C	3	11.96	15.782	0.116164	35.5394	0.204971	1.32025	2.42696	0.0994741	4.17891	0.293275	11.004	0.00392396	1.60708	0.0184862	0.248518	0.241629	0.00427276	0.0584234	0.0824904
Mar	2011	14.59	M. cordfolia	C	1	33.72	16.405	0.106139	32.6711	0.180978	1.00257	2.10742	0.0940139	2.49656	0.235207	10.374	0.00155146	1.37545	0.0129288	0.245647	0.255042	0.00336149	0.0577487	0.104379
Mar	2011	14.59	M. cordfolia	C	2	24.84	15.879	0.181535	24.4978	0.259032	2.66922	2.38271	0.0567369	5.16833	0.945656	10.332	0.00440457	1.82651	0.0196574	0.232463	0.194209	0.00497553	0.0546493	0.103752
Mar	2011	14.59	M. cordfolia	C	3	31.48	15.782	0.116164	35.5394	0.204971	1.32025	2.42696	0.0994741	4.17891	0.293275	11.004	0.00392396	1.60708	0.0184862	0.248518	0.241629	0.00427276	0.0584234	0.0824904
April	2011	14.59	M. cordfolia	C	1	23.28	16.405	0.106139	32.6711	0.180978	1.00257	2.10742	0.0940139	2.49656	0.235207	10.374	0.00155146	1.37545	0.0129288	0.245647	0.255042	0.00336149	0.0577487	0.104379
April	2011	14.59	M. cordfolia	C	2	21.24	15.879	0.181535	24.4978	0.259032	2.66922	2.38271	0.0567369	5.16833	0.945656	10.332	0.00440457	1.82651	0.0196574	0.232463	0.194209	0.00497553	0.0546493	0.103752
April	2011	14.59	M. cordfolia	C	3	24.2	15.782	0.116164	35.5394	0.204971	1.32025	2.42696	0.0994741	4.17891	0.293275	11.004	0.00392396	1.60708	0.0184862	0.248518	0.241629	0.00427276	0.0584234	0.0824904
May	2011	14.59	M. cordfolia	C	1	32.28	16.405	0.106139	32.6711	0.180978	1.00257	2.10742	0.0940139	2.49656	0.235207	10.374	0.00155146	1.37545	0.0129288	0.245647	0.255042	0.00336149	0.0577487	0.104379
May	2011	14.59	M. cordfolia	C	2	24.48	15.879	0.181535	24.4978	0.259032	2.66922	2.38271	0.0567369	5.16833	0.945656	10.332	0.00440457	1.82651	0.0196574	0.232463	0.194209	0.00497553	0.0546493	0.103752
May	2011	14.59	M. cordfolia	C	3	27.92	15.782	0.116164	35.5394	0.204971	1.32025	2.42696	0.0994741	4.17891	0.293275	11.004	0.00392396	1.60708	0.0184862	0.248518	0.241629	0.00427276	0.0584234	0.0824904
June	2011	14.59	M. cordfolia	C	1	26.6	16.405	0.106139	32.6711	0.180978	1.00257	2.10742	0.0940139	2.49656	0.235207	10.374	0.00155146	1.37545	0.0129288	0.245647	0.255042	0.00336149	0.0577487	0.104379
June	2011	14.59	M. cordfolia	C	2	21.28	15.879	0.181535	24.4978	0.259032	2.66922	2.38271	0.0567369	5.16833	0.945656	10.332	0.00440457	1.82651	0.0196574	0.232463	0.194209	0.00497553	0.0546493	0.103752
June	2011	14.59	M. cordfolia	C	3	24.84	15.782	0.116164	35.5394	0.204971	1.32025	2.42696	0.0994741	4.17891	0.293275	11.004	0.00392396	1.60708	0.0184862	0.248518	0.241629	0.00427276	0.0584234	0.0824904
July	2011	14.59	M. cordfolia	C	1	32.28	16.405	0.106139	32.6711	0.180978	1.00257	2.10742	0.0940139	2.49656	0.235207	10.374	0.00155146	1.37545	0.0129288	0.245647	0.255042	0.00336149	0.0577487	0.104379
July	2011	14.59	M. cordfolia	C	2	36.32	15.879	0.181535	24.4978	0.259032	2.66922	2.38271	0.0567369	5.16833	0.945656	10.332	0.00440457	1.82651	0.0196574	0.232463	0.194209	0.00497553	0.0546493	0.103752
July	2011	14.59	M. cordfolia	C	3	31.92	15.782	0.116164	35.5394	0.204971	1.32025	2.42696	0.0994741	4.17891	0.293275	11.004	0.00392396	1.60708	0.0184862	0.248518	0.241629	0.00427276	0.0584234	0.0824904
Aug	2011	14.59	M. cordfolia	C	1	30.24	16.405	0.106139	32.6711	0.180978	1.00257	2.10742	0.0940139	2.49656	0.235207	10.374	0.00155146	1.37545	0.0129288	0.245647	0.255042	0.00336149	0.0577487	0.104379
Aug	2011	14.59	M. cordfolia	C	2	19.8	15.879	0.181535	24.4978	0.259032	2.66922	2.38271	0.0567369	5.16833	0.945656	10.332	0.00440457	1.82651	0.0196574	0.232463	0.194209	0.00497553	0.0546493	0.103752
Aug	2011	14.59	M. cordfolia	C	3	25.8	15.782	0.116164	35.5394	0.204971	1.32025	2.42696	0.0994741	4.17891	0.293275	11.004	0.00392396	1.60708	0.0184862	0.248518	0.241629	0.00427276	0.0584234	0.0824904
Sep	2011	14.59	M. cordfolia	C	1	27.92	16.405	0.106139	32.6711	0.180978	1.00257	2.10742	0.0940139	2.49656	0.235207	10.374	0.00155146	1.37545	0.0129288	0.245647	0.255042	0.00336149	0.0577487	0.104379
Sep	2011	14.59	M. cordfolia	C	2	35.16	15.879	0.181535	24.4978	0.259032	2.66922	2.38271	0.0567369	5.16833	0.945656	10.332	0.00440457	1.82651	0.0196574	0.232463	0.194209	0.00497553	0.0546493	0.103752
Sep	2011	14.59	M. cordfolia	C	3	31.88	15.782	0.116164	35.5394	0.204971	1.32025	2.42696	0.0994741	4.17891	0.293275	11.004	0.00392396	1.60708	0.0184862	0.248518	0.241629	0.00427276	0.0584234	0.0824904
Oct	2011	14.59	M. cordfolia	C	1	31.92	16.405	0.106139	32.6711	0.180978	1.00257	2.10742	0.0940139	2.49656	0.235207	10.374	0.00155146	1.37545	0.0129288	0.245647	0.255042	0.00336149	0.0577487	0.104379
Oct	2011	14.59	M. cordfolia	C	2	24.92	15.879	0.181535	24.4978	0.259032	2.66922	2.38271	0.0567369	5.16833	0.945656	10.332	0.00440457	1.82651	0.0196574	0.232463	0.194209	0.00497553	0.0546493	0.103752
Oct	2011	14.59	M. cordfolia	C	3	28.08	15.782	0.116164	35.5394	0.204971	1.32025	2.42696	0.0994741	4.17891	0.293275	11.004	0.00392396	1.60708	0.0184862	0.248518	0.241629	0.00427276	0.0584234	0.0824904
Nov	2011	14.59	M. cordfolia	C	1	24.92	16.405	0.106139	32.6711	0.180978	1.00257	2.10742	0.0940139	2.49656	0.235207	10.374	0.00155146	1.37545	0.0129288	0.245647	0.255042	0.00336149	0.0577487	0.104379
Nov	2011	14.59	M. cordfolia	C	2	27.56	15.879	0.181535	24.4978	0.259032	2.66922	2.38271	0.0567369	5.16833	0.945656	10.332	0.00440457	1.82651	0.0196574	0.232463	0.194209	0.00497553	0.0546493	0.103752
Nov	2011	14.59	M. cordfolia	C	3	20.08	15.782	0.116164	35.5394	0.204971	1.32025	2.42696	0.0994741	4.17891	0.293275	11.004	0.00392396	1.60708	0.0184862	0.248518	0.241629	0.00427276	0.0584234	0.0824904
Dec	2011	14.59	M. cordfolia	C	1	15.84	16.405	0.106139	32.6711	0.180978	1.00257	2.10742	0.0940139	2.49656	0.235207	10.374	0.00155146	1.37545	0.0129288	0.245647	0.255042	0.00336149	0.0577487	0.104379
Dec	2011	14.59	M. cordfolia	C	2	16.44	15.879	0.181535	24.4978	0.259032	2.66922	2.38271	0.0567369	5.16833	0.945656	10.332	0.00440457	1.82651	0.0196574	0.232463	0.194209	0.00497553	0.0546493	0.103752
Dec	2011	14.59	M. cordfolia	C	3	16.84	15.782	0.116164	35.5394	0.204971	1.32025	2.42696	0.0994741	4.17891	0.293275	11.004	0.00392396	1.60708	0.0184862	0.248518	0.241629	0.00427276	0.0584234	0.0824904
Jan	2011	0.1	M. muricata	C	1	6	10.768	0.259604	16.8648	0.344412	4.53382	7.27457	0.00978463	39.0579	0.762127	7.005	0.00429855	2.08851	0.0240328	0.278429	0.326983	0.000683861	0.0654553	0.119773
Jan	2011	0.1	M. muricata	C	2	6.36	11.165	0.307799	17.7924	0.353042	1.95201	5.09367	0.00692995	17.359	0.719587	8.428	0.00462219	1.563	0.0196945	0.286375	0.271604	0.000602894	0.0673232	0.110531
Jan	2011	0.1	M. muricata	C	3	5.64	10.528	0.345639	15.9692	0.423563	2.8133	6.38292	0.00713174	36.818	0.625045	7.722	0.00627353	2.07915	0.0356545	0.297992	0.354768	0.000941029	0.0700544	0.128921
Jan	2011	3.545	M. muricata	B	1	7.8	6.659	0.197712	29.5907	0.339916	2.49403	4.11793	0.0117488	12.9961	0.583985	5.235	0.00684232	2.06076	0.0208333	0.291054	0.175858	0.000714869	0.0684232	0.0681168
Jan	2011	3.545	M. muricata	B	2	6.44	6.762	0.215391	19.839	0.306852	1.33693	2.99702	0.00655157	9.44141	0.473423	5.458	0.00675966	1.25515	0.0226395	0.305794	0.144635	0.000429185	0.0718884	0.0834764
Jan	2011	3.545	M. muricata	B	3	6.72	6.66		7.17971	0.0449855	0.554357	1.10899		2.61641	0.266473	5.603	0.0157863	3.99423	0.0558591	0.865209	0.401032	0.00121433	0.2034	0.159381
Jan	2011	7.99	M. muricata	C	1	5.04	8.23	0.205503	10.8093	0.309273	1.83446	1.32769	0.00793673	3.03161	0.496825	4.673	0.00533913	1.30581	0.281788	0.281788	0.0825588	0.000593237	0.0662448	0.0923472
Jan	2011	7.99	M. muricata	C	2	8.04	8.874	0.250089	12.414	0.323565	1.53202	1.45924	0.00686936	4.79328	0.585985	5.525	0.00530139	1.27793	0.0166896	0.279796	0.0922835	0.000589044	0.0657766	0.0839387
Jan	2011	7.99	M. muricata	C	3	7.72	8.557	0.301476	26.005	0.366363	1.3502	2.77853	0.0127309	8.09944	0.570431	5.94	0.00522403	2.03597	0.0195901	0.286317	0.114627	0.000703235	0.0673096	0.0786618
Jan	2011	14.59	M. muricata	A	1	6.92	8.836
Jan	2011	14.59	M. muricata	A	2	7.32	8.735
Jan	2011	14.59	M. muricata	A	3	6.56	10.166	0.287436	14.1817	0.336492	2.37167	1.89629	0.0155763	5.15079	0.968392	7.192	0.00451634	1.2902	0.0177369	0.234029	0.137954	0.00123173	0.0550172	0.107571
Jan	2011	16.82	M. muricata	C	1	8.96	11.641	0.338064	23.7416	0.338056	1.79972	0.947861	0.00850132	0.779085	0.747092	7.246	0.0130881	1.11081	0.038203	0.252034	0.22913	0.000619031	0.0592501	0.150336
Jan	2011	16.82	M. muricata	C	2	12.36	10.195	0.208301	26.9793	0.326954	3.61747	3.00531	0.0322794	1.16116	1.8834	5.298	0.00208	0.64344	0.0076	0.228	0.12696	0.00024	0.0536	0.11216
Jan	2011	16.82	M. muricata	C	3	9.76	8.806	0.110181	31.0752	0.183023	4.91176	3.4012	0.0320038	2.06214	2.15043	4.635	0.00303132	0.703772	0.0119569	0.23998	0.187353	0.000673627	0.0543954	0.143146
Feb	2011	0.1	M. muricata	C	1	9.28	10.768	0.259604	16.8648	0.344412	4.53382	7.27457	0.00978463	39.0579	0.762127	7.005	0.00429855	2.08851	0.0240328	0.278429	0.326983	0.000683861	0.0654553	0.119773
Feb	2011	0.1	M. muricata	C	2	19.48	11.165	0.307799	17.7924	0.353042	1.95201	5.09367	0.00692995	17.359	0.719587	8.428	0.00462219	1.563	0.0196945	0.286375	0.271604	0.000602894	0.0673232	0.110531
Feb	2011	0.1	M. muricata	C	3	15.04	10.528	0.345639	15.9692	0.423563	2.8133	6.38292	0.00713174	36.818	0.625045	7.722	0.00627353	2.07915	0.0356545	0.297992	0.354768	0.000941029	0.0700544	0.128921
Feb	2011	3.545	M. muricata	B	1	23.88	6.659	0.197712	29.5907	0.339916	2.49403	4.11793	0.0117488	12.9961	0.583985	5.235	0.00684232	2.06076	0.0208333	0.291054	0.175858	0.000714869	0.0684232	0.0681168
Feb	2011	3.545	M. muricata	B	2	21.32	6.762	0.215391	19.839	0.306852	1.33693	2.99702	0.00655157	9.44141	0.473423	5.458	0.00675966	1.25515	0.0226395	0.305794	0.144635	0.000429185	0.0718884	0.0834764
Feb	2011	3.545	M. muricata	B	3	19.04	6.66		7.17971	0.0449855	0.554357	1.10899		2.61641	0.266473	5.603	0.0157863	3.99423	0.0558591	0.865209	0.401032	0.00121433	0.2034	0.159381
Feb	2011	7.99	M. muricata	C	1	21.16	8.23	0.205503	10.8093	0.309273	1.83446	1.32769	0.00793673	3.03161	0.496825	4.673	0.00533913	1.30581	0.281788	0.281788	0.0825588	0.000593237	0.0662448	0.0923472
Feb	2011	7.99	M. muricata	C	2	13	8.874	0.250089	12.414	0.323565	1.53202	1.45924	0.00686936	4.79328	0.585985	5.525	0.00530139	1.27793	0.0166896	0.279796	0.0922835	0.000589044	0.0657766	0.0839387
Feb	2011	7.99	M. muricata	C	3	20.68	8.557	0.301476	26.005	0.366363	1.3502	2.77853	0.0127309	8.09944	0.570431	5.94	0.00522403	2.03597	0.0195901	0.286317	0.114627	0.000703235	0.0673096	0.0786618
Feb	2011	14.59	M. muricata	A	1	13.2	8.836
Feb	2011	14.59	M. muricata	A	2	16.88	8.735
Feb	2011	14.59	M. muricata	A	3	8.88	10.166	0.287436	14.1817	0.336492	2.37167	1.89629	0.0155763	5.15079	0.968392	7.192	0.00451634	1.2902	0.0177369	0.234029	0.137954	0.00123173	0.0550172	0.107571
Feb	2011	16.82	M. muricata	C	1	22.4	11.641	0.338064	23.7416	0.338056	1.79972	0.947861	0.00850132	0.779085	0.747092	7.246	0.0130881	1.11081	0.038203	0.252034	0.22913	0.000619031	0.0592501	0.150336
Feb	2011	16.82	M. muricata	C	2	13.96	10.195	0.208301	26.9793	0.326954	3.61747	3.00531	0.0322794	1.16116	1.8834	5.298	0.00208	0.64344	0.0076	0.228	0.12696	0.00024	0.0536	0.11216
Feb	2011	16.82	M. muricata	C	3	16.36	8.806	0.110181	31.0752	0.183023	4.91176	3.4012	0.0320038	2.06214	2.15043	4.635	0.00303132	0.703772	0.0119569	0.23998	0.187353	0.000673627	0.0543954	0.143146
Mar	2011	0.1	M. muricata	C	1	17.32	10.768	0.259604	16.8648	0.344412	4.53382	7.27457	0.00978463	39.0579	0.762127	7.005	0.00429855	2.08851	0.0240328	0.278429	0.326983	0.000683861	0.0654553	0.119773
Mar	2011	0.1	M. muricata	C	2	21.16	11.165	0.307799	17.7924	0.353042	1.95201	5.09367	0.00692995	17.359	0.719587	8.428	0.00462219	1.563	0.0196945	0.286375	0.271604	0.000602894	0.0673232	0.110531
Mar	2011	0.1	M. muricata	C	3	25.2	10.528	0.345639	15.9692	0.423563	2.8133	6.38292	0.00713174	36.818	0.625045	7.722	0.00627353	2.07915	0.0356545	0.297992	0.354768	0.000941029	0.0700544	0.128921
Mar	2011	3.545	M. muricata	B	1	18.08	6.659	0.197712	29.5907	0.339916	2.49403	4.11793	0.0117488	12.9961	0.583985	5.235	0.00684232	2.06076	0.0208333	0.291054	0.175858	0.000714869	0.0684232	0.0681168
Mar	2011	3.545	M. muricata	B	2	11.96	6.762	0.215391	19.839	0.306852	1.33693	2.99702	0.00655157	9.44141	0.473423	5.458	0.00675966	1.25515	0.0226395	0.305794	0.144635	0.000429185	0.0718884	0.0834764
Mar	2011	3.545	M. muricata	B	3	9.68	6.66		7.17971	0.0449855	0.554357	1.10899		2.61641	0.266473	5.603	0.0157863	3.99423	0.0558591	0.865209	0.401032	0.00121433	0.2034	0.159381
Mar	2011	7.99	M. muricata	C	1	18.04	8.23	0.205503	10.8093	0.309273	1.83446	1.32769	0.00793673	3.03161	0.496825	4.673	0.00533913	1.30581	0.281788	0.281788	0.0825588	0.000593237	0.0662448	0.0923472
Mar	2011	7.99	M. muricata	C	2	21.16	8.874	0.250089	12.414	0.323565	1.53202	1.45924	0.00686936	4.79328	0.585985	5.525	0.00530139	1.27793	0.0166896	0.279796	0.0922835	0.000589044	0.0657766	0.0839387
Mar	2011	7.99	M. muricata	C	3	21.32	8.557	0.301476	26.005	0.366363	1.3502	2.77853	0.0127309	8.09944	0.570431	5.94	0.00522403	2.03597	0.0195901	0.286317	0.114627	0.000703235	0.0673096	0.0786618
Mar	2011	14.59	M. muricata	A	1	20.76	8.836
Mar	2011	14.59	M. muricata	A	2	18.52	8.735
Mar	2011	14.59	M. muricata	A	3	12.8	10.166	0.287436	14.1817	0.336492	2.37167	1.89629	0.0155763	5.15079	0.968392	7.192	0.00451634	1.2902	0.0177369	0.234029	0.137954	0.00123173	0.0550172	0.107571
Mar	2011	16.82	M. muricata	C	1	16.32	11.641	0.338064	23.7416	0.338056	1.79972	0.947861	0.00850132	0.779085	0.747092	7.246	0.0130881	1.11081	0.038203	0.252034	0.22913	0.000619031	0.0592501	0.150336
Mar	2011	16.82	M. muricata	C	2	15.2	10.195	0.208301	26.9793	0.326954	3.61747	3.00531	0.0322794	1.16116	1.8834	5.298	0.00208	0.64344	0.0076	0.228	0.12696	0.00024	0.0536	0.11216
Mar	2011	16.82	M. muricata	C	3	15	8.806	0.110181	31.0752	0.183023	4.91176	3.4012	0.0320038	2.06214	2.15043	4.635	0.00303132	0.703772	0.0119569	0.23998	0.187353	0.000673627	0.0543954	0.143146
April	2011	0.1	M. muricata	C	1	20.76	10.768	0.259604	16.8648	0.344412	4.53382	7.27457	0.00978463	39.0579	0.762127	7.005	0.00429855	2.08851	0.0240328	0.278429	0.326983	0.000683861	0.0654553	0.119773
April	2011	0.1	M. muricata	C	2	18.36	11.165	0.307799	17.7924	0.353042	1.95201	5.09367	0.00692995	17.359	0.719587	8.428	0.00462219	1.563	0.0196945	0.286375	0.271604	0.000602894	0.0673232	0.110531
April	2011	0.1	M. muricata	C	3	12.84	10.528	0.345639	15.9692	0.423563	2.8133	6.38292	0.00713174	36.818	0.625045	7.722	0.00627353	2.07915	0.0356545	0.297992	0.354768	0.000941029	0.0700544	0.128921
April	2011	3.545	M. muricata	B	1	17.6	6.659	0.197712	29.5907	0.339916	2.49403	4.11793	0.0117488	12.9961	0.583985	5.235	0.00684232	2.06076	0.0208333	0.291054	0.175858	0.000714869	0.0684232	0.0681168
April	2011	3.545	M. muricata	B	2	15.8	6.762	0.215391	19.839	0.306852	1.33693	2.99702	0.00655157	9.44141	0.473423	5.458	0.00675966	1.25515	0.0226395	0.305794	0.144635	0.000429185	0.0718884	0.0834764
April	2011	3.545	M. muricata	B	3	15.68	6.66		7.17971	0.0449855	0.554357	1.10899		2.61641	0.266473	5.603	0.0157863	3.99423	0.0558591	0.865209	0.401032	0.00121433	0.2034	0.159381
April	2011	7.99	M. muricata	C	1	26.44	8.23	0.205503	10.8093	0.309273	1.83446	1.32769	0.00793673	3.03161	0.496825	4.673	0.00533913	1.30581	0.281788	0.281788	0.0825588	0.000593237	0.0662448	0.0923472
April	2011	7.99	M. muricata	C	2	16.64	8.874	0.250089	12.414	0.323565	1.53202	1.45924	0.00686936	4.79328	0.585985	5.525	0.00530139	1.27793	0.0166896	0.279796	0.0922835	0.000589044	0.0657766	0.0839387
April	2011	7.99	M. muricata	C	3	27.92	8.557	0.301476	26.005	0.366363	1.3502	2.77853	0.0127309	8.09944	0.570431	5.94	0.00522403	2.03597	0.0195901	0.286317	0.114627	0.000703235	0.0673096	0.0786618
April	2011	14.59	M. muricata	A	1	22.88	8.836
April	2011	14.59	M. muricata	A	2	16.96	8.735
April	2011	14.59	M. muricata	A	3	19.68	10.166	0.287436	14.1817	0.336492	2.37167	1.89629	0.0155763	5.15079	0.968392	7.192	0.00451634	1.2902	0.0177369	0.234029	0.137954	0.00123173	0.0550172	0.107571
April	2011	16.82	M. muricata	C	1	12.72	11.641	0.338064	23.7416	0.338056	1.79972	0.947861	0.00850132	0.779085	0.747092	7.246	0.0130881	1.11081	0.038203	0.252034	0.22913	0.000619031	0.0592501	0.150336
April	2011	16.82	M. muricata	C	2	16.32	10.195	0.208301	26.9793	0.326954	3.61747	3.00531	0.0322794	1.16116	1.8834	5.298	0.00208	0.64344	0.0076	0.228	0.12696	0.00024	0.0536	0.11216
April	2011	16.82	M. muricata	C	3	14.88	8.806	0.110181	31.0752	0.183023	4.91176	3.4012	0.0320038	2.06214	2.15043	4.635	0.00303132	0.703772	0.0119569	0.23998	0.187353	0.000673627	0.0543954	0.143146
May	2011	0.1	M. muricata	C	1	20.48	10.768	0.259604	16.8648	0.344412	4.53382	7.27457	0.00978463	39.0579	0.762127	7.005	0.00429855	2.08851	0.0240328	0.278429	0.326983	0.000683861	0.0654553	0.119773
May	2011	0.1	M. muricata	C	2	17.72	11.165	0.307799	17.7924	0.353042	1.95201	5.09367	0.00692995	17.359	0.719587	8.428	0.00462219	1.563	0.0196945	0.286375	0.271604	0.000602894	0.0673232	0.110531
May	2011	0.1	M. muricata	C	3	15.28	10.528	0.345639	15.9692	0.423563	2.8133	6.38292	0.00713174	36.818	0.625045	7.722	0.00627353	2.07915	0.0356545	0.297992	0.354768	0.000941029	0.0700544	0.128921
May	2011	3.545	M. muricata	B	1	13.68	6.659	0.197712	29.5907	0.339916	2.49403	4.11793	0.0117488	12.9961	0.583985	5.235	0.00684232	2.06076	0.0208333	0.291054	0.175858	0.000714869	0.0684232	0.0681168
May	2011	3.545	M. muricata	B	2	18.24	6.762	0.215391	19.839	0.306852	1.33693	2.99702	0.00655157	9.44141	0.473423	5.458	0.00675966	1.25515	0.0226395	0.305794	0.144635	0.000429185	0.0718884	0.0834764
May	2011	3.545	M. muricata	B	3	14.04	6.66		7.17971	0.0449855	0.554357	1.10899		2.61641	0.266473	5.603	0.0157863	3.99423	0.0558591	0.865209	0.401032	0.00121433	0.2034	0.159381
May	2011	7.99	M. muricata	C	1	17	8.23	0.205503	10.8093	0.309273	1.83446	1.32769	0.00793673	3.03161	0.496825	4.673	0.00533913	1.30581	0.281788	0.281788	0.0825588	0.000593237	0.0662448	0.0923472
May	2011	7.99	M. muricata	C	2	25.08	8.874	0.250089	12.414	0.323565	1.53202	1.45924	0.00686936	4.79328	0.585985	5.525	0.00530139	1.27793	0.0166896	0.279796	0.0922835	0.000589044	0.0657766	0.0839387
May	2011	7.99	M. muricata	C	3	23.48	8.557	0.301476	26.005	0.366363	1.3502	2.77853	0.0127309	8.09944	0.570431	5.94	0.00522403	2.03597	0.0195901	0.286317	0.114627	0.000703235	0.0673096	0.0786618
May	2011	14.59	M. muricata	A	1	17.36	8.836
May	2011	14.59	M. muricata	A	2	14.52	8.735
May	2011	14.59	M. muricata	A	3	19.84	10.166	0.287436	14.1817	0.336492	2.37167	1.89629	0.0155763	5.15079	0.968392	7.192	0.00451634	1.2902	0.0177369	0.234029	0.137954	0.00123173	0.0550172	0.107571
May	2011	16.82	M. muricata	C	1	19.56	11.641	0.338064	23.7416	0.338056	1.79972	0.947861	0.00850132	0.779085	0.747092	7.246	0.0130881	1.11081	0.038203	0.252034	0.22913	0.000619031	0.0592501	0.150336
May	2011	16.82	M. muricata	C	2	19.88	10.195	0.208301	26.9793	0.326954	3.61747	3.00531	0.0322794	1.16116	1.8834	5.298	0.00208	0.64344	0.0076	0.228	0.12696	0.00024	0.0536	0.11216
May	2011	16.82	M. muricata	C	3	19.32	8.806	0.110181	31.0752	0.183023	4.91176	3.4012	0.0320038	2.06214	2.15043	4.635	0.00303132	0.703772	0.0119569	0.23998	0.187353	0.000673627	0.0543954	0.143146
June	2011	0.1	M. muricata	C	1	6.16	10.768	0.259604	16.8648	0.344412	4.53382	7.27457	0.00978463	39.0579	0.762127	7.005	0.00429855	2.08851	0.0240328	0.278429	0.326983	0.000683861	0.0654553	0.119773
June	2011	0.1	M. muricata	C	2	8	11.165	0.307799	17.7924	0.353042	1.95201	5.09367	0.00692995	17.359	0.719587	8.428	0.00462219	1.563	0.0196945	0.286375	0.271604	0.000602894	0.0673232	0.110531
June	2011	0.1	M. muricata	C	3	7.04	10.528	0.345639	15.9692	0.423563	2.8133	6.38292	0.00713174	36.818	0.625045	7.722	0.00627353	2.07915	0.0356545	0.297992	0.354768	0.000941029	0.0700544	0.128921
June	2011	3.545	M. muricata	B	1	12.88	6.659	0.197712	29.5907	0.339916	2.49403	4.11793	0.0117488	12.9961	0.583985	5.235	0.00684232	2.06076	0.0208333	0.291054	0.175858	0.000714869	0.0684232	0.0681168
June	2011	3.545	M. muricata	B	2	14.2	6.762	0.215391	19.839	0.306852	1.33693	2.99702	0.00655157	9.44141	0.473423	5.458	0.00675966	1.25515	0.0226395	0.305794	0.144635	0.000429185	0.0718884	0.0834764
June	2011	3.545	M. muricata	B	3	15.92	6.66		7.17971	0.0449855	0.554357	1.10899		2.61641	0.266473	5.603	0.0157863	3.99423	0.0558591	0.865209	0.401032	0.00121433	0.2034	0.159381
June	2011	7.99	M. muricata	C	1	19.52	8.23	0.205503	10.8093	0.309273	1.83446	1.32769	0.00793673	3.03161	0.496825	4.673	0.00533913	1.30581	0.281788	0.281788	0.0825588	0.000593237	0.0662448	0.0923472
June	2011	7.99	M. muricata	C	2	18.88	8.874	0.250089	12.414	0.323565	1.53202	1.45924	0.00686936	4.79328	0.585985	5.525	0.00530139	1.27793	0.0166896	0.279796	0.0922835	0.000589044	0.0657766	0.0839387
June	2011	7.99	M. muricata	C	3	12.24	8.557	0.301476	26.005	0.366363	1.3502	2.77853	0.0127309	8.09944	0.570431	5.94	0.00522403	2.03597	0.0195901	0.286317	0.114627	0.000703235	0.0673096	0.0786618
June	2011	14.59	M. muricata	A	1	14.48	8.836
June	2011	14.59	M. muricata	A	2	15.2	8.735
June	2011	14.59	M. muricata	A	3	15.92	10.166	0.287436	14.1817	0.336492	2.37167	1.89629	0.0155763	5.15079	0.968392	7.192	0.00451634	1.2902	0.0177369	0.234029	0.137954	0.00123173	0.0550172	0.107571
June	2011	16.82	M. muricata	C	1	22.32	11.641	0.338064	23.7416	0.338056	1.79972	0.947861	0.00850132	0.779085	0.747092	7.246	0.0130881	1.11081	0.038203	0.252034	0.22913	0.000619031	0.0592501	0.150336
June	2011	16.82	M. muricata	C	2	14.36	10.195	0.208301	26.9793	0.326954	3.61747	3.00531	0.0322794	1.16116	1.8834	5.298	0.00208	0.64344	0.0076	0.228	0.12696	0.00024	0.0536	0.11216
June	2011	16.82	M. muricata	C	3	15.76	8.806	0.110181	31.0752	0.183023	4.91176	3.4012	0.0320038	2.06214	2.15043	4.635	0.00303132	0.703772	0.0119569	0.23998	0.187353	0.000673627	0.0543954	0.143146
July	2011	0.1	M. muricata	C	1	10.4	10.768	0.259604	16.8648	0.344412	4.53382	7.27457	0.00978463	39.0579	0.762127	7.005	0.00429855	2.08851	0.0240328	0.278429	0.326983	0.000683861	0.0654553	0.119773
July	2011	0.1	M. muricata	C	2	16.04	11.165	0.307799	17.7924	0.353042	1.95201	5.09367	0.00692995	17.359	0.719587	8.428	0.00462219	1.563	0.0196945	0.286375	0.271604	0.000602894	0.0673232	0.110531
July	2011	0.1	M. muricata	C	3	19.92	10.528	0.345639	15.9692	0.423563	2.8133	6.38292	0.00713174	36.818	0.625045	7.722	0.00627353	2.07915	0.0356545	0.297992	0.354768	0.000941029	0.0700544	0.128921
July	2011	3.545	M. muricata	B	1	27.52	6.659	0.197712	29.5907	0.339916	2.49403	4.11793	0.0117488	12.9961	0.583985	5.235	0.00684232	2.06076	0.0208333	0.291054	0.175858	0.000714869	0.0684232	0.0681168
July	2011	3.545	M. muricata	B	2	22.32	6.762	0.215391	19.839	0.306852	1.33693	2.99702	0.00655157	9.44141	0.473423	5.458	0.00675966	1.25515	0.0226395	0.305794	0.144635	0.000429185	0.0718884	0.0834764
July	2011	3.545	M. muricata	B	3	22.6	6.66		7.17971	0.0449855	0.554357	1.10899		2.61641	0.266473	5.603	0.0157863	3.99423	0.0558591	0.865209	0.401032	0.00121433	0.2034	0.159381
July	2011	7.99	M. muricata	C	1	35.12	8.23	0.205503	10.8093	0.309273	1.83446	1.32769	0.00793673	3.03161	0.496825	4.673	0.00533913	1.30581	0.281788	0.281788	0.0825588	0.000593237	0.0662448	0.0923472
July	2011	7.99	M. muricata	C	2	23.92	8.874	0.250089	12.414	0.323565	1.53202	1.45924	0.00686936	4.79328	0.585985	5.525	0.00530139	1.27793	0.0166896	0.279796	0.0922835	0.000589044	0.0657766	0.0839387
July	2011	7.99	M. muricata	C	3	19.88	8.557	0.301476	26.005	0.366363	1.3502	2.77853	0.0127309	8.09944	0.570431	5.94	0.00522403	2.03597	0.0195901	0.286317	0.114627	0.000703235	0.0673096	0.0786618
July	2011	14.59	M. muricata	A	1	22.36	8.836
July	2011	14.59	M. muricata	A	2	19.04	8.735
July	2011	14.59	M. muricata	A	3	23.96	10.166	0.287436	14.1817	0.336492	2.37167	1.89629	0.0155763	5.15079	0.968392	7.192	0.00451634	1.2902	0.0177369	0.234029	0.137954	0.00123173	0.0550172	0.107571
July	2011	16.82	M. muricata	C	1	27.56	11.641	0.338064	23.7416	0.338056	1.79972	0.947861	0.00850132	0.779085	0.747092	7.246	0.0130881	1.11081	0.038203	0.252034	0.22913	0.000619031	0.0592501	0.150336
July	2011	16.82	M. muricata	C	2	23.12	10.195	0.208301	26.9793	0.326954	3.61747	3.00531	0.0322794	1.16116	1.8834	5.298	0.00208	0.64344	0.0076	0.228	0.12696	0.00024	0.0536	0.11216
July	2011	16.82	M. muricata	C	3	23.48	8.806	0.110181	31.0752	0.183023	4.91176	3.4012	0.0320038	2.06214	2.15043	4.635	0.00303132	0.703772	0.0119569	0.23998	0.187353	0.000673627	0.0543954	0.143146
Aug	2011	0.1	M. muricata	C	1	17.44	10.768	0.259604	16.8648	0.344412	4.53382	7.27457	0.00978463	39.0579	0.762127	7.005	0.00429855	2.08851	0.0240328	0.278429	0.326983	0.000683861	0.0654553	0.119773
Aug	2011	0.1	M. muricata	C	2	20.24	11.165	0.307799	17.7924	0.353042	1.95201	5.09367	0.00692995	17.359	0.719587	8.428	0.00462219	1.563	0.0196945	0.286375	0.271604	0.000602894	0.0673232	0.110531
Aug	2011	0.1	M. muricata	C	3	18.2	10.528	0.345639	15.9692	0.423563	2.8133	6.38292	0.00713174	36.818	0.625045	7.722	0.00627353	2.07915	0.0356545	0.297992	0.354768	0.000941029	0.0700544	0.128921
Aug	2011	3.545	M. muricata	B	1	18.2	6.659	0.197712	29.5907	0.339916	2.49403	4.11793	0.0117488	12.9961	0.583985	5.235	0.00684232	2.06076	0.0208333	0.291054	0.175858	0.000714869	0.0684232	0.0681168
Aug	2011	3.545	M. muricata	B	2	13.72	6.762	0.215391	19.839	0.306852	1.33693	2.99702	0.00655157	9.44141	0.473423	5.458	0.00675966	1.25515	0.0226395	0.305794	0.144635	0.000429185	0.0718884	0.0834764
Aug	2011	3.545	M. muricata	B	3	14.08	6.66		7.17971	0.0449855	0.554357	1.10899		2.61641	0.266473	5.603	0.0157863	3.99423	0.0558591	0.865209	0.401032	0.00121433	0.2034	0.159381
Aug	2011	7.99	M. muricata	C	1	18.12	8.23	0.205503	10.8093	0.309273	1.83446	1.32769	0.00793673	3.03161	0.496825	4.673	0.00533913	1.30581	0.281788	0.281788	0.0825588	0.000593237	0.0662448	0.0923472
Aug	2011	7.99	M. muricata	C	2	18.88	8.874	0.250089	12.414	0.323565	1.53202	1.45924	0.00686936	4.79328	0.585985	5.525	0.00530139	1.27793	0.0166896	0.279796	0.0922835	0.000589044	0.0657766	0.0839387
Aug	2011	7.99	M. muricata	C	3	22.32	8.557	0.301476	26.005	0.366363	1.3502	2.77853	0.0127309	8.09944	0.570431	5.94	0.00522403	2.03597	0.0195901	0.286317	0.114627	0.000703235	0.0673096	0.0786618
Aug	2011	14.59	M. muricata	A	1	9.2	8.836
Aug	2011	14.59	M. muricata	A	2	7.88	8.735
Aug	2011	14.59	M. muricata	A	3	9.24	10.166	0.287436	14.1817	0.336492	2.37167	1.89629	0.0155763	5.15079	0.968392	7.192	0.00451634	1.2902	0.0177369	0.234029	0.137954	0.00123173	0.0550172	0.107571
Aug	2011	16.82	M. muricata	C	1	19.92	11.641	0.338064	23.7416	0.338056	1.79972	0.947861	0.00850132	0.779085	0.747092	7.246	0.0130881	1.11081	0.038203	0.252034	0.22913	0.000619031	0.0592501	0.150336
Aug	2011	16.82	M. muricata	C	2	12.36	10.195	0.208301	26.9793	0.326954	3.61747	3.00531	0.0322794	1.16116	1.8834	5.298	0.00208	0.64344	0.0076	0.228	0.12696	0.00024	0.0536	0.11216
Aug	2011	16.82	M. muricata	C	3	13.24	8.806	0.110181	31.0752	0.183023	4.91176	3.4012	0.0320038	2.06214	2.15043	4.635	0.00303132	0.703772	0.0119569	0.23998	0.187353	0.000673627	0.0543954	0.143146
Sep	2011	0.1	M. muricata	C	1	20.04	10.768	0.259604	16.8648	0.344412	4.53382	7.27457	0.00978463	39.0579	0.762127	7.005	0.00429855	2.08851	0.0240328	0.278429	0.326983	0.000683861	0.0654553	0.119773
Sep	2011	0.1	M. muricata	C	2	18.32	11.165	0.307799	17.7924	0.353042	1.95201	5.09367	0.00692995	17.359	0.719587	8.428	0.00462219	1.563	0.0196945	0.286375	0.271604	0.000602894	0.0673232	0.110531
Sep	2011	0.1	M. muricata	C	3	16.6	10.528	0.345639	15.9692	0.423563	2.8133	6.38292	0.00713174	36.818	0.625045	7.722	0.00627353	2.07915	0.0356545	0.297992	0.354768	0.000941029	0.0700544	0.128921
Sep	2011	3.545	M. muricata	B	1	17.56	6.659	0.197712	29.5907	0.339916	2.49403	4.11793	0.0117488	12.9961	0.583985	5.235	0.00684232	2.06076	0.0208333	0.291054	0.175858	0.000714869	0.0684232	0.0681168
Sep	2011	3.545	M. muricata	B	2	11.88	6.762	0.215391	19.839	0.306852	1.33693	2.99702	0.00655157	9.44141	0.473423	5.458	0.00675966	1.25515	0.0226395	0.305794	0.144635	0.000429185	0.0718884	0.0834764
Sep	2011	3.545	M. muricata	B	3	15.68	6.66		7.17971	0.0449855	0.554357	1.10899		2.61641	0.266473	5.603	0.0157863	3.99423	0.0558591	0.865209	0.401032	0.00121433	0.2034	0.159381
Sep	2011	7.99	M. muricata	C	1	16.32	8.23	0.205503	10.8093	0.309273	1.83446	1.32769	0.00793673	3.03161	0.496825	4.673	0.00533913	1.30581	0.281788	0.281788	0.0825588	0.000593237	0.0662448	0.0923472
Sep	2011	7.99	M. muricata	C	2	9.16	8.874	0.250089	12.414	0.323565	1.53202	1.45924	0.00686936	4.79328	0.585985	5.525	0.00530139	1.27793	0.0166896	0.279796	0.0922835	0.000589044	0.0657766	0.0839387
Sep	2011	7.99	M. muricata	C	3	20.64	8.557	0.301476	26.005	0.366363	1.3502	2.77853	0.0127309	8.09944	0.570431	5.94	0.00522403	2.03597	0.0195901	0.286317	0.114627	0.000703235	0.0673096	0.0786618
Sep	2011	10.65	M. muricata	C	1	16.96	6.365	0.0393367	25.5472	0.0886579	5.64445	3.1479	0.0324233	3.03274	2.45218	4.331	0.00256253	2.3649	0.00943009	0.292128	0.195879	0.000820008	0.0686757	0.174252
Sep	2011	10.65	M. muricata	C	2	16.32	7.722	0.105181	22.641	0.155674	5.85628	2.14205	0.0171254	2.02624	1.85892	6.083	0.00318602	2.62847	0.0136691	0.292909	0.203905	0.000924974	0.0688592	0.174717
Sep	2011	10.65	M. muricata	C	3	17.64	6.763	0.0721059	36.1707	0.11325	3.24567	4.226	0.00759131	2.69654	2.22857	4.629	0.00173153	2.50272	0.00832784	0.234993	0.375989	0.000577177	0.0552441	0.140172
Sep	2011	14.59	M. muricata	A	1	12.96	8.836
Sep	2011	14.59	M. muricata	A	2	15.92	8.735
Sep	2011	14.59	M. muricata	A	3	14.68	10.166	0.287436	14.1817	0.336492	2.37167	1.89629	0.0155763	5.15079	0.968392	7.192	0.00451634	1.2902	0.0177369	0.234029	0.137954	0.00123173	0.0550172	0.107571
Sep	2011	16.82	M. muricata	C	1	16.72	11.641	0.338064	23.7416	0.338056	1.79972	0.947861	0.00850132	0.779085	0.747092	7.246	0.0130881	1.11081	0.038203	0.252034	0.22913	0.000619031	0.0592501	0.150336
Sep	2011	16.82	M. muricata	C	2	15.32	10.195	0.208301	26.9793	0.326954	3.61747	3.00531	0.0322794	1.16116	1.8834	5.298	0.00208	0.64344	0.0076	0.228	0.12696	0.00024	0.0536	0.11216
Sep	2011	16.82	M. muricata	C	3	15.04	8.806	0.110181	31.0752	0.183023	4.91176	3.4012	0.0320038	2.06214	2.15043	4.635	0.00303132	0.703772	0.0119569	0.23998	0.187353	0.000673627	0.0543954	0.143146
Oct	2011	0.1	M. muricata	C	1	8.52	10.768	0.259604	16.8648	0.344412	4.53382	7.27457	0.00978463	39.0579	0.762127	7.005	0.00429855	2.08851	0.0240328	0.278429	0.326983	0.000683861	0.0654553	0.119773
Oct	2011	0.1	M. muricata	C	2	5.8	11.165	0.307799	17.7924	0.353042	1.95201	5.09367	0.00692995	17.359	0.719587	8.428	0.00462219	1.563	0.0196945	0.286375	0.271604	0.000602894	0.0673232	0.110531
Oct	2011	0.1	M. muricata	C	3	11.16	10.528	0.345639	15.9692	0.423563	2.8133	6.38292	0.00713174	36.818	0.625045	7.722	0.00627353	2.07915	0.0356545	0.297992	0.354768	0.000941029	0.0700544	0.128921
Oct	2011	3.545	M. muricata	B	1	13.68	6.659	0.197712	29.5907	0.339916	2.49403	4.11793	0.0117488	12.9961	0.583985	5.235	0.00684232	2.06076	0.0208333	0.291054	0.175858	0.000714869	0.0684232	0.0681168
Oct	2011	3.545	M. muricata	B	2	9.96	6.762	0.215391	19.839	0.306852	1.33693	2.99702	0.00655157	9.44141	0.473423	5.458	0.00675966	1.25515	0.0226395	0.305794	0.144635	0.000429185	0.0718884	0.0834764
Oct	2011	3.545	M. muricata	B	3	6.08	6.66		7.17971	0.0449855	0.554357	1.10899		2.61641	0.266473	5.603	0.0157863	3.99423	0.0558591	0.865209	0.401032	0.00121433	0.2034	0.159381
Oct	2011	7.99	M. muricata	C	1	7.76	8.23	0.205503	10.8093	0.309273	1.83446	1.32769	0.00793673	3.03161	0.496825	4.673	0.00533913	1.30581	0.281788	0.281788	0.0825588	0.000593237	0.0662448	0.0923472
Oct	2011	7.99	M. muricata	C	2	10.92	8.874	0.250089	12.414	0.323565	1.53202	1.45924	0.00686936	4.79328	0.585985	5.525	0.00530139	1.27793	0.0166896	0.279796	0.0922835	0.000589044	0.0657766	0.0839387
Oct	2011	7.99	M. muricata	C	3	14.36	8.557	0.301476	26.005	0.366363	1.3502	2.77853	0.0127309	8.09944	0.570431	5.94	0.00522403	2.03597	0.0195901	0.286317	0.114627	0.000703235	0.0673096	0.0786618
Oct	2011	10.65	M. muricata	C	1	7.24	6.365	0.0393367	25.5472	0.0886579	5.64445	3.1479	0.0324233	3.03274	2.45218	4.331	0.00256253	2.3649	0.00943009	0.292128	0.195879	0.000820008	0.0686757	0.174252
Oct	2011	10.65	M. muricata	C	2	10.28	7.722	0.105181	22.641	0.155674	5.85628	2.14205	0.0171254	2.02624	1.85892	6.083	0.00318602	2.62847	0.0136691	0.292909	0.203905	0.000924974	0.0688592	0.174717
Oct	2011	10.65	M. muricata	C	3	12.64	6.763	0.0721059	36.1707	0.11325	3.24567	4.226	0.00759131	2.69654	2.22857	4.629	0.00173153	2.50272	0.00832784	0.234993	0.375989	0.000577177	0.0552441	0.140172
Oct	2011	14.59	M. muricata	A	1	3.96	8.836
Oct	2011	14.59	M. muricata	A	2	3.32	8.735
Oct	2011	14.59	M. muricata	A	3	3.92	10.166	0.287436	14.1817	0.336492	2.37167	1.89629	0.0155763	5.15079	0.968392	7.192	0.00451634	1.2902	0.0177369	0.234029	0.137954	0.00123173	0.0550172	0.107571
Oct	2011	16.82	M. muricata	C	1	15.04	11.641	0.338064	23.7416	0.338056	1.79972	0.947861	0.00850132	0.779085	0.747092	7.246	0.0130881	1.11081	0.038203	0.252034	0.22913	0.000619031	0.0592501	0.150336
Oct	2011	16.82	M. muricata	C	2	17.64	10.195	0.208301	26.9793	0.326954	3.61747	3.00531	0.0322794	1.16116	1.8834	5.298	0.00208	0.64344	0.0076	0.228	0.12696	0.00024	0.0536	0.11216
Oct	2011	16.82	M. muricata	C	3	19.32	8.806	0.110181	31.0752	0.183023	4.91176	3.4012	0.0320038	2.06214	2.15043	4.635	0.00303132	0.703772	0.0119569	0.23998	0.187353	0.000673627	0.0543954	0.143146
Nov	2011	0.1	M. muricata	C	1	6.44	10.768	0.259604	16.8648	0.344412	4.53382	7.27457	0.00978463	39.0579	0.762127	7.005	0.00429855	2.08851	0.0240328	0.278429	0.326983	0.000683861	0.0654553	0.119773
Nov	2011	0.1	M. muricata	C	2	12.36	11.165	0.307799	17.7924	0.353042	1.95201	5.09367	0.00692995	17.359	0.719587	8.428	0.00462219	1.563	0.0196945	0.286375	0.271604	0.000602894	0.0673232	0.110531
Nov	2011	0.1	M. muricata	C	3	11.04	10.528	0.345639	15.9692	0.423563	2.8133	6.38292	0.00713174	36.818	0.625045	7.722	0.00627353	2.07915	0.0356545	0.297992	0.354768	0.000941029	0.0700544	0.128921
Nov	2011	3.545	M. muricata	B	1	11.76	6.659	0.197712	29.5907	0.339916	2.49403	4.11793	0.0117488	12.9961	0.583985	5.235	0.00684232	2.06076	0.0208333	0.291054	0.175858	0.000714869	0.0684232	0.0681168
Nov	2011	3.545	M. muricata	B	2	7.52	6.762	0.215391	19.839	0.306852	1.33693	2.99702	0.00655157	9.44141	0.473423	5.458	0.00675966	1.25515	0.0226395	0.305794	0.144635	0.000429185	0.0718884	0.0834764
Nov	2011	3.545	M. muricata	B	3	10.76	6.66		7.17971	0.0449855	0.554357	1.10899		2.61641	0.266473	5.603	0.0157863	3.99423	0.0558591	0.865209	0.401032	0.00121433	0.2034	0.159381
Nov	2011	7.99	M. muricata	C	1	4.24	8.23	0.205503	10.8093	0.309273	1.83446	1.32769	0.00793673	3.03161	0.496825	4.673	0.00533913	1.30581	0.281788	0.281788	0.0825588	0.000593237	0.0662448	0.0923472
Nov	2011	7.99	M. muricata	C	2	8	8.874	0.250089	12.414	0.323565	1.53202	1.45924	0.00686936	4.79328	0.585985	5.525	0.00530139	1.27793	0.0166896	0.279796	0.0922835	0.000589044	0.0657766	0.0839387
Nov	2011	7.99	M. muricata	C	3	11.72	8.557	0.301476	26.005	0.366363	1.3502	2.77853	0.0127309	8.09944	0.570431	5.94	0.00522403	2.03597	0.0195901	0.286317	0.114627	0.000703235	0.0673096	0.0786618
Nov	2011	10.65	M. muricata	C	1	23.88	6.365	0.0393367	25.5472	0.0886579	5.64445	3.1479	0.0324233	3.03274	2.45218	4.331	0.00256253	2.3649	0.00943009	0.292128	0.195879	0.000820008	0.0686757	0.174252
Nov	2011	10.65	M. muricata	C	2	22.12	7.722	0.105181	22.641	0.155674	5.85628	2.14205	0.0171254	2.02624	1.85892	6.083	0.00318602	2.62847	0.0136691	0.292909	0.203905	0.000924974	0.0688592	0.174717
Nov	2011	10.65	M. muricata	C	3	20.84	6.763	0.0721059	36.1707	0.11325	3.24567	4.226	0.00759131	2.69654	2.22857	4.629	0.00173153	2.50272	0.00832784	0.234993	0.375989	0.000577177	0.0552441	0.140172
Nov	2011	14.59	M. muricata	A	1	6.88	8.836
Nov	2011	14.59	M. muricata	A	2	7.32	8.735
Nov	2011	14.59	M. muricata	A	3	6.52	10.166	0.287436	14.1817	0.336492	2.37167	1.89629	0.0155763	5.15079	0.968392	7.192	0.00451634	1.2902	0.0177369	0.234029	0.137954	0.00123173	0.0550172	0.107571
Nov	2011	16.82	M. muricata	C	1	15.32	11.641	0.338064	23.7416	0.338056	1.79972	0.947861	0.00850132	0.779085	0.747092	7.246	0.0130881	1.11081	0.038203	0.252034	0.22913	0.000619031	0.0592501	0.150336
Nov	2011	16.82	M. muricata	C	2	15.88	10.195	0.208301	26.9793	0.326954	3.61747	3.00531	0.0322794	1.16116	1.8834	5.298	0.00208	0.64344	0.0076	0.228	0.12696	0.00024	0.0536	0.11216
Nov	2011	16.82	M. muricata	C	3	17.16	8.806	0.110181	31.0752	0.183023	4.91176	3.4012	0.0320038	2.06214	2.15043	4.635	0.00303132	0.703772	0.0119569	0.23998	0.187353	0.000673627	0.0543954	0.143146
Dec	2011	0.1	M. muricata	C	1	15.36	10.768	0.259604	16.8648	0.344412	4.53382	7.27457	0.00978463	39.0579	0.762127	7.005	0.00429855	2.08851	0.0240328	0.278429	0.326983	0.000683861	0.0654553	0.119773
Dec	2011	0.1	M. muricata	C	2	16.36	11.165	0.307799	17.7924	0.353042	1.95201	5.09367	0.00692995	17.359	0.719587	8.428	0.00462219	1.563	0.0196945	0.286375	0.271604	0.000602894	0.0673232	0.110531
Dec	2011	0.1	M. muricata	C	3	15.12	10.528	0.345639	15.9692	0.423563	2.8133	6.38292	0.00713174	36.818	0.625045	7.722	0.00627353	2.07915	0.0356545	0.297992	0.354768	0.000941029	0.0700544	0.128921
Dec	2011	3.545	M. muricata	B	1	9.72	6.659	0.197712	29.5907	0.339916	2.49403	4.11793	0.0117488	12.9961	0.583985	5.235	0.00684232	2.06076	0.0208333	0.291054	0.175858	0.000714869	0.0684232	0.0681168
Dec	2011	3.545	M. muricata	B	2	7.84	6.762	0.215391	19.839	0.306852	1.33693	2.99702	0.00655157	9.44141	0.473423	5.458	0.00675966	1.25515	0.0226395	0.305794	0.144635	0.000429185	0.0718884	0.0834764
Dec	2011	3.545	M. muricata	B	3	10.04	6.66		7.17971	0.0449855	0.554357	1.10899		2.61641	0.266473	5.603	0.0157863	3.99423	0.0558591	0.865209	0.401032	0.00121433	0.2034	0.159381
Dec	2011	7.99	M. muricata	C	1	6.88	8.23	0.205503	10.8093	0.309273	1.83446	1.32769	0.00793673	3.03161	0.496825	4.673	0.00533913	1.30581	0.281788	0.281788	0.0825588	0.000593237	0.0662448	0.0923472
Dec	2011	7.99	M. muricata	C	2	8.12	8.874	0.250089	12.414	0.323565	1.53202	1.45924	0.00686936	4.79328	0.585985	5.525	0.00530139	1.27793	0.0166896	0.279796	0.0922835	0.000589044	0.0657766	0.0839387
Dec	2011	7.99	M. muricata	C	3	7.4	8.557	0.301476	26.005	0.366363	1.3502	2.77853	0.0127309	8.09944	0.570431	5.94	0.00522403	2.03597	0.0195901	0.286317	0.114627	0.000703235	0.0673096	0.0786618
Dec	2011	10.65	M. muricata	C	1	15.56	6.365	0.0393367	25.5472	0.0886579	5.64445	3.1479	0.0324233	3.03274	2.45218	4.331	0.00256253	2.3649	0.00943009	0.292128	0.195879	0.000820008	0.0686757	0.174252
Dec	2011	10.65	M. muricata	C	2	20.88	7.722	0.105181	22.641	0.155674	5.85628	2.14205	0.0171254	2.02624	1.85892	6.083	0.00318602	2.62847	0.0136691	0.292909	0.203905	0.000924974	0.0688592	0.174717
Dec	2011	10.65	M. muricata	C	3	23.56	6.763	0.0721059	36.1707	0.11325	3.24567	4.226	0.00759131	2.69654	2.22857	4.629	0.00173153	2.50272	0.00832784	0.234993	0.375989	0.000577177	0.0552441	0.140172
Dec	2011	14.59	M. muricata	A	1	5.6	8.836
Dec	2011	14.59	M. muricata	A	2	8.08	8.735
Dec	2011	14.59	M. muricata	A	3	7.56	10.166	0.287436	14.1817	0.336492	2.37167	1.89629	0.0155763	5.15079	0.968392	7.192	0.00451634	1.2902	0.0177369	0.234029	0.137954	0.00123173	0.0550172	0.107571
Jan	2011	6.09	S. glauca	A	1	29.36	4.773		26.6358	0.0756133	2.12959	4.22258	0.0041747	6.66746	2.24914	4.614	0.00140506	1.07637	0.00702529	0.221397	0.168005	0.000200723	0.0672421	0.170614
Jan	2011	6.09	S. glauca	A	2	41.4	4.775									3.38
Jan	2011	6.09	S. glauca	A	3	20.36	5.531		21.2058	0.0475663	3.35834	3.48438	0.00463785	4.52386	1.40865	4.878	0.00139553	1.57825	0.00877193	0.193581	0.266946	0.000398724	0.0667863	0.121611
Jan	2011	7.99	S. glauca	B	1	30.88	14.222	0.00681274	16.8175	0.0809078	2.11048	2.94881	0.00240236	6.46531	1.50341	7.36	0.00103199	1.16398	0.00722394	0.294118	0.245304	0.000309598	0.0691434	0.175439
Jan	2011	7.99	S. glauca	B	2	25.88	12.448		27.0595	0.0668453	1.67169	3.3371	0.00339724	6.17908	1.76129	7.472	0.00102987	1.64449	0.00484037	0.293512	0.284243	0.00030896	0.069001	0.175077
Jan	2011	7.99	S. glauca	B	3	29	8.206		24.937	0.0639771	2.66724	3.08254	0.00536082	3.72445	1.51126	6.938	0.00131446	1.65329	0.0116279	0.28817	0.27816	0.000505561	0.0677452	0.171891
Jan	2011	12.53	S. glauca	A	1	32.84	12.176
Jan	2011	12.53	S. glauca	A	2	26.8	7.512
Jan	2011	12.53	S. glauca	A	3	32.76	7.687	0.006886	28.3755	0.0489824	7.84181	2.73508	0.0123847	3.30505	2.90685	4.184	0.000877193	1.45921	0.00736842	0.25	0.157807	0.000701754	0.0587719	0.149123
Jan	2011	16.82	S. glauca	A	1	25	10.842	0.163801	16.0126	0.196456	1.67359	0.907505	0.00814797	1.35874	0.615341	7.104	0.000882457	1.71558	0.00335334	0.2515	0.253706	0.00114719	0.0591246	0.150018
Jan	2011	16.82	S. glauca	A	2	27.96	7.774		35.2407	0.0545567	2.52214	4.46992	0.0193341	1.52385	4.56339	5.569	0.000998004	1.37535	0.00848303	0.284431	0.227645	0.000998004	0.0668663	0.169661
Jan	2011	16.82	S. glauca	A	3	27.04	10.747		33.8389	0.0490857	3.49904	3.57746	0.0223207	2.65796	3.09028	4.889	0.000850774	0.908201	0.00535988	0.242471	0.165646	0.000935852	0.0570019	0.144632
Feb	2011	6.09	S. glauca	A	1	15.96	4.773		26.6358	0.0756133	2.12959	4.22258	0.0041747	6.66746	2.24914	4.614	0.00140506	1.07637	0.00702529	0.221397	0.168005	0.000200723	0.0672421	0.170614
Feb	2011	6.09	S. glauca	A	2	22.76	4.775									3.38
Feb	2011	6.09	S. glauca	A	3	7.8	5.531		21.2058	0.0475663	3.35834	3.48438	0.00463785	4.52386	1.40865	4.878	0.00139553	1.57825	0.00877193	0.193581	0.266946	0.000398724	0.0667863	0.121611
Feb	2011	7.99	S. glauca	B	1	13.32	14.222	0.00681274	16.8175	0.0809078	2.11048	2.94881	0.00240236	6.46531	1.50341	7.36	0.00103199	1.16398	0.00722394	0.294118	0.245304	0.000309598	0.0691434	0.175439
Feb	2011	7.99	S. glauca	B	2	16.32	12.448		27.0595	0.0668453	1.67169	3.3371	0.00339724	6.17908	1.76129	7.472	0.00102987	1.64449	0.00484037	0.293512	0.284243	0.00030896	0.069001	0.175077
Feb	2011	7.99	S. glauca	B	3	15.64	8.206		24.937	0.0639771	2.66724	3.08254	0.00536082	3.72445	1.51126	6.938	0.00131446	1.65329	0.0116279	0.28817	0.27816	0.000505561	0.0677452	0.171891
Feb	2011	12.53	S. glauca	A	1	19.84	12.176
Feb	2011	12.53	S. glauca	A	2	19.96	7.512
Feb	2011	12.53	S. glauca	A	3	18.2	7.687	0.006886	28.3755	0.0489824	7.84181	2.73508	0.0123847	3.30505	2.90685	4.184	0.000877193	1.45921	0.00736842	0.25	0.157807	0.000701754	0.0587719	0.149123
Feb	2011	16.82	S. glauca	A	1	18.24	10.842	0.163801	16.0126	0.196456	1.67359	0.907505	0.00814797	1.35874	0.615341	7.104	0.000882457	1.71558	0.00335334	0.2515	0.253706	0.00114719	0.0591246	0.150018
Feb	2011	16.82	S. glauca	A	2	15.84	7.774		35.2407	0.0545567	2.52214	4.46992	0.0193341	1.52385	4.56339	5.569	0.000998004	1.37535	0.00848303	0.284431	0.227645	0.000998004	0.0668663	0.169661
Feb	2011	16.82	S. glauca	A	3	23.92	10.747		33.8389	0.0490857	3.49904	3.57746	0.0223207	2.65796	3.09028	4.889	0.000850774	0.908201	0.00535988	0.242471	0.165646	0.000935852	0.0570019	0.144632
Mar	2011	6.09	S. glauca	A	1	24.36	4.773		26.6358	0.0756133	2.12959	4.22258	0.0041747	6.66746	2.24914	4.614	0.00140506	1.07637	0.00702529	0.221397	0.168005	0.000200723	0.0672421	0.170614
Mar	2011	6.09	S. glauca	A	2	17.36	4.775									3.38
Mar	2011	6.09	S. glauca	A	3	9.24	5.531		21.2058	0.0475663	3.35834	3.48438	0.00463785	4.52386	1.40865	4.878	0.00139553	1.57825	0.00877193	0.193581	0.266946	0.000398724	0.0667863	0.121611
Mar	2011	7.99	S. glauca	B	1	15.4	14.222	0.00681274	16.8175	0.0809078	2.11048	2.94881	0.00240236	6.46531	1.50341	7.36	0.00103199	1.16398	0.00722394	0.294118	0.245304	0.000309598	0.0691434	0.175439
Mar	2011	7.99	S. glauca	B	2	22.24	12.448		27.0595	0.0668453	1.67169	3.3371	0.00339724	6.17908	1.76129	7.472	0.00102987	1.64449	0.00484037	0.293512	0.284243	0.00030896	0.069001	0.175077
Mar	2011	7.99	S. glauca	B	3	20.2	8.206		24.937	0.0639771	2.66724	3.08254	0.00536082	3.72445	1.51126	6.938	0.00131446	1.65329	0.0116279	0.28817	0.27816	0.000505561	0.0677452	0.171891
Mar	2011	12.53	S. glauca	A	1	21.16	12.176
Mar	2011	12.53	S. glauca	A	2	23.88	7.512
Mar	2011	12.53	S. glauca	A	3	13.8	7.687	0.006886	28.3755	0.0489824	7.84181	2.73508	0.0123847	3.30505	2.90685	4.184	0.000877193	1.45921	0.00736842	0.25	0.157807	0.000701754	0.0587719	0.149123
Mar	2011	16.82	S. glauca	A	1	17.84	10.842	0.163801	16.0126	0.196456	1.67359	0.907505	0.00814797	1.35874	0.615341	7.104	0.000882457	1.71558	0.00335334	0.2515	0.253706	0.00114719	0.0591246	0.150018
Mar	2011	16.82	S. glauca	A	2	13	7.774		35.2407	0.0545567	2.52214	4.46992	0.0193341	1.52385	4.56339	5.569	0.000998004	1.37535	0.00848303	0.284431	0.227645	0.000998004	0.0668663	0.169661
Mar	2011	16.82	S. glauca	A	3	21.88	10.747		33.8389	0.0490857	3.49904	3.57746	0.0223207	2.65796	3.09028	4.889	0.000850774	0.908201	0.00535988	0.242471	0.165646	0.000935852	0.0570019	0.144632
April	2011	6.09	S. glauca	A	1	14.4	4.773		26.6358	0.0756133	2.12959	4.22258	0.0041747	6.66746	2.24914	4.614	0.00140506	1.07637	0.00702529	0.221397	0.168005	0.000200723	0.0672421	0.170614
April	2011	6.09	S. glauca	A	2	21.92	4.775									3.38
April	2011	6.09	S. glauca	A	3	9.48	5.531		21.2058	0.0475663	3.35834	3.48438	0.00463785	4.52386	1.40865	4.878	0.00139553	1.57825	0.00877193	0.193581	0.266946	0.000398724	0.0667863	0.121611
April	2011	7.99	S. glauca	B	1	13.68	14.222	0.00681274	16.8175	0.0809078	2.11048	2.94881	0.00240236	6.46531	1.50341	7.36	0.00103199	1.16398	0.00722394	0.294118	0.245304	0.000309598	0.0691434	0.175439
April	2011	7.99	S. glauca	B	2	9.32	12.448		27.0595	0.0668453	1.67169	3.3371	0.00339724	6.17908	1.76129	7.472	0.00102987	1.64449	0.00484037	0.293512	0.284243	0.00030896	0.069001	0.175077
April	2011	7.99	S. glauca	B	3	17.28	8.206		24.937	0.0639771	2.66724	3.08254	0.00536082	3.72445	1.51126	6.938	0.00131446	1.65329	0.0116279	0.28817	0.27816	0.000505561	0.0677452	0.171891
April	2011	12.53	S. glauca	A	1	15	12.176
April	2011	12.53	S. glauca	A	2	17.28	7.512
April	2011	12.53	S. glauca	A	3	21.32	7.687	0.006886	28.3755	0.0489824	7.84181	2.73508	0.0123847	3.30505	2.90685	4.184	0.000877193	1.45921	0.00736842	0.25	0.157807	0.000701754	0.0587719	0.149123
April	2011	16.82	S. glauca	A	1	15.4	10.842	0.163801	16.0126	0.196456	1.67359	0.907505	0.00814797	1.35874	0.615341	7.104	0.000882457	1.71558	0.00335334	0.2515	0.253706	0.00114719	0.0591246	0.150018
April	2011	16.82	S. glauca	A	2	12.76	7.774		35.2407	0.0545567	2.52214	4.46992	0.0193341	1.52385	4.56339	5.569	0.000998004	1.37535	0.00848303	0.284431	0.227645	0.000998004	0.0668663	0.169661
April	2011	16.82	S. glauca	A	3	18.12	10.747		33.8389	0.0490857	3.49904	3.57746	0.0223207	2.65796	3.09028	4.889	0.000850774	0.908201	0.00535988	0.242471	0.165646	0.000935852	0.0570019	0.144632
May	2011	6.09	S. glauca	A	1	18.44	4.773		26.6358	0.0756133	2.12959	4.22258	0.0041747	6.66746	2.24914	4.614	0.00140506	1.07637	0.00702529	0.221397	0.168005	0.000200723	0.0672421	0.170614
May	2011	6.09	S. glauca	A	2	22.24	4.775									3.38
May	2011	6.09	S. glauca	A	3	25.76	5.531		21.2058	0.0475663	3.35834	3.48438	0.00463785	4.52386	1.40865	4.878	0.00139553	1.57825	0.00877193	0.193581	0.266946	0.000398724	0.0667863	0.121611
May	2011	7.99	S. glauca	B	1	17.36	14.222	0.00681274	16.8175	0.0809078	2.11048	2.94881	0.00240236	6.46531	1.50341	7.36	0.00103199	1.16398	0.00722394	0.294118	0.245304	0.000309598	0.0691434	0.175439
May	2011	7.99	S. glauca	B	2	23.96	12.448		27.0595	0.0668453	1.67169	3.3371	0.00339724	6.17908	1.76129	7.472	0.00102987	1.64449	0.00484037	0.293512	0.284243	0.00030896	0.069001	0.175077
May	2011	7.99	S. glauca	B	3	12.72	8.206		24.937	0.0639771	2.66724	3.08254	0.00536082	3.72445	1.51126	6.938	0.00131446	1.65329	0.0116279	0.28817	0.27816	0.000505561	0.0677452	0.171891
May	2011	12.53	S. glauca	A	1	19.4	12.176
May	2011	12.53	S. glauca	A	2	12.84	7.512
May	2011	12.53	S. glauca	A	3	22.04	7.687	0.006886	28.3755	0.0489824	7.84181	2.73508	0.0123847	3.30505	2.90685	4.184	0.000877193	1.45921	0.00736842	0.25	0.157807	0.000701754	0.0587719	0.149123
May	2011	16.82	S. glauca	A	1	18.2	10.842	0.163801	16.0126	0.196456	1.67359	0.907505	0.00814797	1.35874	0.615341	7.104	0.000882457	1.71558	0.00335334	0.2515	0.253706	0.00114719	0.0591246	0.150018
May	2011	16.82	S. glauca	A	2	19.92	7.774		35.2407	0.0545567	2.52214	4.46992	0.0193341	1.52385	4.56339	5.569	0.000998004	1.37535	0.00848303	0.284431	0.227645	0.000998004	0.0668663	0.169661
May	2011	16.82	S. glauca	A	3	15.96	10.747		33.8389	0.0490857	3.49904	3.57746	0.0223207	2.65796	3.09028	4.889	0.000850774	0.908201	0.00535988	0.242471	0.165646	0.000935852	0.0570019	0.144632
June	2011	6.09	S. glauca	A	1	18.36	4.773		26.6358	0.0756133	2.12959	4.22258	0.0041747	6.66746	2.24914	4.614	0.00140506	1.07637	0.00702529	0.221397	0.168005	0.000200723	0.0672421	0.170614
June	2011	6.09	S. glauca	A	2	30.76	4.775									3.38
June	2011	6.09	S. glauca	A	3	23.12	5.531		21.2058	0.0475663	3.35834	3.48438	0.00463785	4.52386	1.40865	4.878	0.00139553	1.57825	0.00877193	0.193581	0.266946	0.000398724	0.0667863	0.121611
June	2011	7.99	S. glauca	B	1	25.12	14.222	0.00681274	16.8175	0.0809078	2.11048	2.94881	0.00240236	6.46531	1.50341	7.36	0.00103199	1.16398	0.00722394	0.294118	0.245304	0.000309598	0.0691434	0.175439
June	2011	7.99	S. glauca	B	2	27.56	12.448		27.0595	0.0668453	1.67169	3.3371	0.00339724	6.17908	1.76129	7.472	0.00102987	1.64449	0.00484037	0.293512	0.284243	0.00030896	0.069001	0.175077
June	2011	7.99	S. glauca	B	3	23.92	8.206		24.937	0.0639771	2.66724	3.08254	0.00536082	3.72445	1.51126	6.938	0.00131446	1.65329	0.0116279	0.28817	0.27816	0.000505561	0.0677452	0.171891
June	2011	12.53	S. glauca	A	1	24.48	12.176
June	2011	12.53	S. glauca	A	2	19	7.512
June	2011	12.53	S. glauca	A	3	27.56	7.687	0.006886	28.3755	0.0489824	7.84181	2.73508	0.0123847	3.30505	2.90685	4.184	0.000877193	1.45921	0.00736842	0.25	0.157807	0.000701754	0.0587719	0.149123
June	2011	16.82	S. glauca	A	1	24.92	10.842	0.163801	16.0126	0.196456	1.67359	0.907505	0.00814797	1.35874	0.615341	7.104	0.000882457	1.71558	0.00335334	0.2515	0.253706	0.00114719	0.0591246	0.150018
June	2011	16.82	S. glauca	A	2	19.32	7.774		35.2407	0.0545567	2.52214	4.46992	0.0193341	1.52385	4.56339	5.569	0.000998004	1.37535	0.00848303	0.284431	0.227645	0.000998004	0.0668663	0.169661
June	2011	16.82	S. glauca	A	3	23.56	10.747		33.8389	0.0490857	3.49904	3.57746	0.0223207	2.65796	3.09028	4.889	0.000850774	0.908201	0.00535988	0.242471	0.165646	0.000935852	0.0570019	0.144632
July	2011	6.09	S. glauca	A	1	13.48	4.773		26.6358	0.0756133	2.12959	4.22258	0.0041747	6.66746	2.24914	4.614	0.00140506	1.07637	0.00702529	0.221397	0.168005	0.000200723	0.0672421	0.170614
July	2011	6.09	S. glauca	A	2	6.96	4.775									3.38
July	2011	6.09	S. glauca	A	3	9.56	5.531		21.2058	0.0475663	3.35834	3.48438	0.00463785	4.52386	1.40865	4.878	0.00139553	1.57825	0.00877193	0.193581	0.266946	0.000398724	0.0667863	0.121611
July	2011	7.99	S. glauca	B	1	9.2	14.222	0.00681274	16.8175	0.0809078	2.11048	2.94881	0.00240236	6.46531	1.50341	7.36	0.00103199	1.16398	0.00722394	0.294118	0.245304	0.000309598	0.0691434	0.175439
July	2011	7.99	S. glauca	B	2	16.32	12.448		27.0595	0.0668453	1.67169	3.3371	0.00339724	6.17908	1.76129	7.472	0.00102987	1.64449	0.00484037	0.293512	0.284243	0.00030896	0.069001	0.175077
July	2011	7.99	S. glauca	B	3	13.28	8.206		24.937	0.0639771	2.66724	3.08254	0.00536082	3.72445	1.51126	6.938	0.00131446	1.65329	0.0116279	0.28817	0.27816	0.000505561	0.0677452	0.171891
July	2011	12.53	S. glauca	A	1	9.76	12.176
July	2011	12.53	S. glauca	A	2	12.36	7.512
July	2011	12.53	S. glauca	A	3	15.88	7.687	0.006886	28.3755	0.0489824	7.84181	2.73508	0.0123847	3.30505	2.90685	4.184	0.000877193	1.45921	0.00736842	0.25	0.157807	0.000701754	0.0587719	0.149123
July	2011	16.82	S. glauca	A	1	11	10.842	0.163801	16.0126	0.196456	1.67359	0.907505	0.00814797	1.35874	0.615341	7.104	0.000882457	1.71558	0.00335334	0.2515	0.253706	0.00114719	0.0591246	0.150018
July	2011	16.82	S. glauca	A	2	12.36	7.774		35.2407	0.0545567	2.52214	4.46992	0.0193341	1.52385	4.56339	5.569	0.000998004	1.37535	0.00848303	0.284431	0.227645	0.000998004	0.0668663	0.169661
July	2011	16.82	S. glauca	A	3	11.88	10.747		33.8389	0.0490857	3.49904	3.57746	0.0223207	2.65796	3.09028	4.889	0.000850774	0.908201	0.00535988	0.242471	0.165646	0.000935852	0.0570019	0.144632
Aug	2011	6.09	S. glauca	A	1	15.92	4.773		26.6358	0.0756133	2.12959	4.22258	0.0041747	6.66746	2.24914	4.614	0.00140506	1.07637	0.00702529	0.221397	0.168005	0.000200723	0.0672421	0.170614
Aug	2011	6.09	S. glauca	A	2	9.8	4.775									3.38
Aug	2011	6.09	S. glauca	A	3	13.12	5.531		21.2058	0.0475663	3.35834	3.48438	0.00463785	4.52386	1.40865	4.878	0.00139553	1.57825	0.00877193	0.193581	0.266946	0.000398724	0.0667863	0.121611
Aug	2011	7.99	S. glauca	B	1	15.48	14.222	0.00681274	16.8175	0.0809078	2.11048	2.94881	0.00240236	6.46531	1.50341	7.36	0.00103199	1.16398	0.00722394	0.294118	0.245304	0.000309598	0.0691434	0.175439
Aug	2011	7.99	S. glauca	B	2	12.76	12.448		27.0595	0.0668453	1.67169	3.3371	0.00339724	6.17908	1.76129	7.472	0.00102987	1.64449	0.00484037	0.293512	0.284243	0.00030896	0.069001	0.175077
Aug	2011	7.99	S. glauca	B	3	16.36	8.206		24.937	0.0639771	2.66724	3.08254	0.00536082	3.72445	1.51126	6.938	0.00131446	1.65329	0.0116279	0.28817	0.27816	0.000505561	0.0677452	0.171891
Aug	2011	12.53	S. glauca	A	1	14.2	12.176
Aug	2011	12.53	S. glauca	A	2	12	7.512
Aug	2011	12.53	S. glauca	A	3	8.32	7.687	0.006886	28.3755	0.0489824	7.84181	2.73508	0.0123847	3.30505	2.90685	4.184	0.000877193	1.45921	0.00736842	0.25	0.157807	0.000701754	0.0587719	0.149123
Aug	2011	16.82	S. glauca	A	1	13.08	10.842	0.163801	16.0126	0.196456	1.67359	0.907505	0.00814797	1.35874	0.615341	7.104	0.000882457	1.71558	0.00335334	0.2515	0.253706	0.00114719	0.0591246	0.150018
Aug	2011	16.82	S. glauca	A	2	11.8	7.774		35.2407	0.0545567	2.52214	4.46992	0.0193341	1.52385	4.56339	5.569	0.000998004	1.37535	0.00848303	0.284431	0.227645	0.000998004	0.0668663	0.169661
Aug	2011	16.82	S. glauca	A	3	15.92	10.747		33.8389	0.0490857	3.49904	3.57746	0.0223207	2.65796	3.09028	4.889	0.000850774	0.908201	0.00535988	0.242471	0.165646	0.000935852	0.0570019	0.144632
Sep	2011	6.09	S. glauca	A	1	5.28	4.773		26.6358	0.0756133	2.12959	4.22258	0.0041747	6.66746	2.24914	4.614	0.00140506	1.07637	0.00702529	0.221397	0.168005	0.000200723	0.0672421	0.170614
Sep	2011	6.09	S. glauca	A	2	5	4.775									3.38
Sep	2011	6.09	S. glauca	A	3	5.64	5.531		21.2058	0.0475663	3.35834	3.48438	0.00463785	4.52386	1.40865	4.878	0.00139553	1.57825	0.00877193	0.193581	0.266946	0.000398724	0.0667863	0.121611
Sep	2011	7.99	S. glauca	B	1	4.88	14.222	0.00681274	16.8175	0.0809078	2.11048	2.94881	0.00240236	6.46531	1.50341	7.36	0.00103199	1.16398	0.00722394	0.294118	0.245304	0.000309598	0.0691434	0.175439
Sep	2011	7.99	S. glauca	B	2	5.24	12.448		27.0595	0.0668453	1.67169	3.3371	0.00339724	6.17908	1.76129	7.472	0.00102987	1.64449	0.00484037	0.293512	0.284243	0.00030896	0.069001	0.175077
Sep	2011	7.99	S. glauca	B	3	5.6	8.206		24.937	0.0639771	2.66724	3.08254	0.00536082	3.72445	1.51126	6.938	0.00131446	1.65329	0.0116279	0.28817	0.27816	0.000505561	0.0677452	0.171891
Sep	2011	12.53	S. glauca	A	1	6.92	12.176
Sep	2011	12.53	S. glauca	A	2	8.04	7.512
Sep	2011	12.53	S. glauca	A	3	5.2	7.687	0.006886	28.3755	0.0489824	7.84181	2.73508	0.0123847	3.30505	2.90685	4.184	0.000877193	1.45921	0.00736842	0.25	0.157807	0.000701754	0.0587719	0.149123
Sep	2011	16.82	S. glauca	A	1	5.04	10.842	0.163801	16.0126	0.196456	1.67359	0.907505	0.00814797	1.35874	0.615341	7.104	0.000882457	1.71558	0.00335334	0.2515	0.253706	0.00114719	0.0591246	0.150018
Sep	2011	16.82	S. glauca	A	2	5.68	7.774		35.2407	0.0545567	2.52214	4.46992	0.0193341	1.52385	4.56339	5.569	0.000998004	1.37535	0.00848303	0.284431	0.227645	0.000998004	0.0668663	0.169661
Sep	2011	16.82	S. glauca	A	3	5.32	10.747		33.8389	0.0490857	3.49904	3.57746	0.0223207	2.65796	3.09028	4.889	0.000850774	0.908201	0.00535988	0.242471	0.165646	0.000935852	0.0570019	0.144632
Oct	2011	6.09	S. glauca	A	1	18.36	4.773		26.6358	0.0756133	2.12959	4.22258	0.0041747	6.66746	2.24914	4.614	0.00140506	1.07637	0.00702529	0.221397	0.168005	0.000200723	0.0672421	0.170614
Oct	2011	6.09	S. glauca	A	2	18.72	4.775									3.38
Oct	2011	6.09	S. glauca	A	3	15.92	5.531		21.2058	0.0475663	3.35834	3.48438	0.00463785	4.52386	1.40865	4.878	0.00139553	1.57825	0.00877193	0.193581	0.266946	0.000398724	0.0667863	0.121611
Oct	2011	7.99	S. glauca	B	1	18.84	14.222	0.00681274	16.8175	0.0809078	2.11048	2.94881	0.00240236	6.46531	1.50341	7.36	0.00103199	1.16398	0.00722394	0.294118	0.245304	0.000309598	0.0691434	0.175439
Oct	2011	7.99	S. glauca	B	2	17.4	12.448		27.0595	0.0668453	1.67169	3.3371	0.00339724	6.17908	1.76129	7.472	0.00102987	1.64449	0.00484037	0.293512	0.284243	0.00030896	0.069001	0.175077
Oct	2011	7.99	S. glauca	B	3	14.92	8.206		24.937	0.0639771	2.66724	3.08254	0.00536082	3.72445	1.51126	6.938	0.00131446	1.65329	0.0116279	0.28817	0.27816	0.000505561	0.0677452	0.171891
Oct	2011	12.53	S. glauca	A	1	17.28	12.176
Oct	2011	12.53	S. glauca	A	2	20.36	7.512
Oct	2011	12.53	S. glauca	A	3	17.24	7.687	0.006886	28.3755	0.0489824	7.84181	2.73508	0.0123847	3.30505	2.90685	4.184	0.000877193	1.45921	0.00736842	0.25	0.157807	0.000701754	0.0587719	0.149123
Oct	2011	16.82	S. glauca	A	1	15.44	10.842	0.163801	16.0126	0.196456	1.67359	0.907505	0.00814797	1.35874	0.615341	7.104	0.000882457	1.71558	0.00335334	0.2515	0.253706	0.00114719	0.0591246	0.150018
Oct	2011	16.82	S. glauca	A	2	17.56	7.774		35.2407	0.0545567	2.52214	4.46992	0.0193341	1.52385	4.56339	5.569	0.000998004	1.37535	0.00848303	0.284431	0.227645	0.000998004	0.0668663	0.169661
Oct	2011	16.82	S. glauca	A	3	15.92	10.747		33.8389	0.0490857	3.49904	3.57746	0.0223207	2.65796	3.09028	4.889	0.000850774	0.908201	0.00535988	0.242471	0.165646	0.000935852	0.0570019	0.144632
Nov	2011	6.09	S. glauca	A	1	18.72	4.773		26.6358	0.0756133	2.12959	4.22258	0.0041747	6.66746	2.24914	4.614	0.00140506	1.07637	0.00702529	0.221397	0.168005	0.000200723	0.0672421	0.170614
Nov	2011	6.09	S. glauca	A	2	22.76	4.775									3.38
Nov	2011	6.09	S. glauca	A	3	18.64	5.531		21.2058	0.0475663	3.35834	3.48438	0.00463785	4.52386	1.40865	4.878	0.00139553	1.57825	0.00877193	0.193581	0.266946	0.000398724	0.0667863	0.121611
Nov	2011	7.99	S. glauca	B	1	30.68	14.222	0.00681274	16.8175	0.0809078	2.11048	2.94881	0.00240236	6.46531	1.50341	7.36	0.00103199	1.16398	0.00722394	0.294118	0.245304	0.000309598	0.0691434	0.175439
Nov	2011	7.99	S. glauca	B	2	19.88	12.448		27.0595	0.0668453	1.67169	3.3371	0.00339724	6.17908	1.76129	7.472	0.00102987	1.64449	0.00484037	0.293512	0.284243	0.00030896	0.069001	0.175077
Nov	2011	7.99	S. glauca	B	3	34.2	8.206		24.937	0.0639771	2.66724	3.08254	0.00536082	3.72445	1.51126	6.938	0.00131446	1.65329	0.0116279	0.28817	0.27816	0.000505561	0.0677452	0.171891
Nov	2011	12.53	S. glauca	A	1	17.88	12.176
Nov	2011	12.53	S. glauca	A	2	19.56	7.512
Nov	2011	12.53	S. glauca	A	3	19.08	7.687	0.006886	28.3755	0.0489824	7.84181	2.73508	0.0123847	3.30505	2.90685	4.184	0.000877193	1.45921	0.00736842	0.25	0.157807	0.000701754	0.0587719	0.149123
Nov	2011	16.82	S. glauca	A	1	22.12	10.842	0.163801	16.0126	0.196456	1.67359	0.907505	0.00814797	1.35874	0.615341	7.104	0.000882457	1.71558	0.00335334	0.2515	0.253706	0.00114719	0.0591246	0.150018
Nov	2011	16.82	S. glauca	A	2	18.68	7.774		35.2407	0.0545567	2.52214	4.46992	0.0193341	1.52385	4.56339	5.569	0.000998004	1.37535	0.00848303	0.284431	0.227645	0.000998004	0.0668663	0.169661
Nov	2011	16.82	S. glauca	A	3	19.12	10.747		33.8389	0.0490857	3.49904	3.57746	0.0223207	2.65796	3.09028	4.889	0.000850774	0.908201	0.00535988	0.242471	0.165646	0.000935852	0.0570019	0.144632
Dec	2011	6.09	S. glauca	A	1	18.2	4.773		26.6358	0.0756133	2.12959	4.22258	0.0041747	6.66746	2.24914	4.614	0.00140506	1.07637	0.00702529	0.221397	0.168005	0.000200723	0.0672421	0.170614
Dec	2011	6.09	S. glauca	A	2	23.12	4.775									3.38
Dec	2011	6.09	S. glauca	A	3	15.92	5.531		21.2058	0.0475663	3.35834	3.48438	0.00463785	4.52386	1.40865	4.878	0.00139553	1.57825	0.00877193	0.193581	0.266946	0.000398724	0.0667863	0.121611
Dec	2011	7.99	S. glauca	B	1	23.52	14.222	0.00681274	16.8175	0.0809078	2.11048	2.94881	0.00240236	6.46531	1.50341	7.36	0.00103199	1.16398	0.00722394	0.294118	0.245304	0.000309598	0.0691434	0.175439
Dec	2011	7.99	S. glauca	B	2	23.36	12.448		27.0595	0.0668453	1.67169	3.3371	0.00339724	6.17908	1.76129	7.472	0.00102987	1.64449	0.00484037	0.293512	0.284243	0.00030896	0.069001	0.175077
Dec	2011	7.99	S. glauca	B	3	22.92	8.206		24.937	0.0639771	2.66724	3.08254	0.00536082	3.72445	1.51126	6.938	0.00131446	1.65329	0.0116279	0.28817	0.27816	0.000505561	0.0677452	0.171891
Dec	2011	12.53	S. glauca	A	1	23.68	12.176
Dec	2011	12.53	S. glauca	A	2	23.76	7.512
Dec	2011	12.53	S. glauca	A	3	24.08	7.687	0.006886	28.3755	0.0489824	7.84181	2.73508	0.0123847	3.30505	2.90685	4.184	0.000877193	1.45921	0.00736842	0.25	0.157807	0.000701754	0.0587719	0.149123
Jan	2011	6.09	S. lucida	C	1	8.36	6.26		26.4865	0.043515	2.71138	2.96044	0.00478274	3.32644	1.26708	5.314	0.00209354	2.77771	0.0121425	0.180568	0.490307	0.000418708	0.0701336	0.177951
Jan	2011	6.09	S. lucida	C	2	17.76	6.124		19.7034	0.0617834	3.3324	3.31668	0.00315828	8.12673	3.08798	5.922	0.00322321	1.68211	0.0117849	0.216257	0.291096	0.000402901	0.0674859	0.171233
Jan	2011	6.09	S. lucida	C	3	19.92	5.719		31.7902	0.0729364	3.92147	5.03844	0.00685303	4.6436	1.85468	5.206	0.00192581	3.78745	0.0102372	0.25076	0.55595	0.000810866	0.06791	0.172309
Jan	2011	7.99	S. lucida	A	1	17.48	15.569		37.3553	0.053274	1.95941	5.26455	0.00288671	4.02624	2.49932	6.772	0.00118601	2.29314	0.00494169	0.281676	0.278415	0.000593003	0.0662186	0.168017
Jan	2011	7.99	S. lucida	A	2	16.28	18.301		30.7835	0.0358929	1.90171	4.72091	0.00292106	3.50048	1.69772	6.166	0.00102145	1.18315	0.00674157	0.291113	0.284678	0.00102145	0.0684372	0.173647
Jan	2011	7.99	S. lucida	A	3	15.84	16.894
Feb	2011	6.09	S. lucida	C	1	7.68	6.26		26.4865	0.043515	2.71138	2.96044	0.00478274	3.32644	1.26708	5.314	0.00209354	2.77771	0.0121425	0.180568	0.490307	0.000418708	0.0701336	0.177951
Feb	2011	6.09	S. lucida	C	2	9.8	6.124		19.7034	0.0617834	3.3324	3.31668	0.00315828	8.12673	3.08798	5.922	0.00322321	1.68211	0.0117849	0.216257	0.291096	0.000402901	0.0674859	0.171233
Feb	2011	6.09	S. lucida	C	3	13.28	5.719		31.7902	0.0729364	3.92147	5.03844	0.00685303	4.6436	1.85468	5.206	0.00192581	3.78745	0.0102372	0.25076	0.55595	0.000810866	0.06791	0.172309
Feb	2011	7.99	S. lucida	A	1	8.6	15.569		37.3553	0.053274	1.95941	5.26455	0.00288671	4.02624	2.49932	6.772	0.00118601	2.29314	0.00494169	0.281676	0.278415	0.000593003	0.0662186	0.168017
Feb	2011	7.99	S. lucida	A	2	14.16	18.301		30.7835	0.0358929	1.90171	4.72091	0.00292106	3.50048	1.69772	6.166	0.00102145	1.18315	0.00674157	0.291113	0.284678	0.00102145	0.0684372	0.173647
Feb	2011	7.99	S. lucida	A	3	11.16	16.894
Mar	2011	6.09	S. lucida	C	1	9.8	6.26		26.4865	0.043515	2.71138	2.96044	0.00478274	3.32644	1.26708	5.314	0.00209354	2.77771	0.0121425	0.180568	0.490307	0.000418708	0.0701336	0.177951
Mar	2011	6.09	S. lucida	C	2	9.2	6.124		19.7034	0.0617834	3.3324	3.31668	0.00315828	8.12673	3.08798	5.922	0.00322321	1.68211	0.0117849	0.216257	0.291096	0.000402901	0.0674859	0.171233
Mar	2011	6.09	S. lucida	C	3	16	5.719		31.7902	0.0729364	3.92147	5.03844	0.00685303	4.6436	1.85468	5.206	0.00192581	3.78745	0.0102372	0.25076	0.55595	0.000810866	0.06791	0.172309
Mar	2011	7.99	S. lucida	A	1	9.68	15.569		37.3553	0.053274	1.95941	5.26455	0.00288671	4.02624	2.49932	6.772	0.00118601	2.29314	0.00494169	0.281676	0.278415	0.000593003	0.0662186	0.168017
Mar	2011	7.99	S. lucida	A	2	13.8	18.301		30.7835	0.0358929	1.90171	4.72091	0.00292106	3.50048	1.69772	6.166	0.00102145	1.18315	0.00674157	0.291113	0.284678	0.00102145	0.0684372	0.173647
Mar	2011	7.99	S. lucida	A	3	9.44	16.894
April	2011	6.09	S. lucida	C	1	21.8	6.26		26.4865	0.043515	2.71138	2.96044	0.00478274	3.32644	1.26708	5.314	0.00209354	2.77771	0.0121425	0.180568	0.490307	0.000418708	0.0701336	0.177951
April	2011	6.09	S. lucida	C	2	8.28	6.124		19.7034	0.0617834	3.3324	3.31668	0.00315828	8.12673	3.08798	5.922	0.00322321	1.68211	0.0117849	0.216257	0.291096	0.000402901	0.0674859	0.171233
April	2011	6.09	S. lucida	C	3	11.52	5.719		31.7902	0.0729364	3.92147	5.03844	0.00685303	4.6436	1.85468	5.206	0.00192581	3.78745	0.0102372	0.25076	0.55595	0.000810866	0.06791	0.172309
April	2011	7.99	S. lucida	A	1	9.72	15.569		37.3553	0.053274	1.95941	5.26455	0.00288671	4.02624	2.49932	6.772	0.00118601	2.29314	0.00494169	0.281676	0.278415	0.000593003	0.0662186	0.168017
April	2011	7.99	S. lucida	A	2	12.36	18.301		30.7835	0.0358929	1.90171	4.72091	0.00292106	3.50048	1.69772	6.166	0.00102145	1.18315	0.00674157	0.291113	0.284678	0.00102145	0.0684372	0.173647
April	2011	7.99	S. lucida	A	3	16.84	16.894
May	2011	6.09	S. lucida	C	1	25.92	6.26		26.4865	0.043515	2.71138	2.96044	0.00478274	3.32644	1.26708	5.314	0.00209354	2.77771	0.0121425	0.180568	0.490307	0.000418708	0.0701336	0.177951
May	2011	6.09	S. lucida	C	2	11.16	6.124		19.7034	0.0617834	3.3324	3.31668	0.00315828	8.12673	3.08798	5.922	0.00322321	1.68211	0.0117849	0.216257	0.291096	0.000402901	0.0674859	0.171233
May	2011	6.09	S. lucida	C	3	24.28	5.719		31.7902	0.0729364	3.92147	5.03844	0.00685303	4.6436	1.85468	5.206	0.00192581	3.78745	0.0102372	0.25076	0.55595	0.000810866	0.06791	0.172309
May	2011	7.99	S. lucida	A	1	18.08	15.569		37.3553	0.053274	1.95941	5.26455	0.00288671	4.02624	2.49932	6.772	0.00118601	2.29314	0.00494169	0.281676	0.278415	0.000593003	0.0662186	0.168017
May	2011	7.99	S. lucida	A	2	16.32	18.301		30.7835	0.0358929	1.90171	4.72091	0.00292106	3.50048	1.69772	6.166	0.00102145	1.18315	0.00674157	0.291113	0.284678	0.00102145	0.0684372	0.173647
May	2011	7.99	S. lucida	A	3	13.64	16.894
June	2011	6.09	S. lucida	C	1	6	6.26		26.4865	0.043515	2.71138	2.96044	0.00478274	3.32644	1.26708	5.314	0.00209354	2.77771	0.0121425	0.180568	0.490307	0.000418708	0.0701336	0.177951
June	2011	6.09	S. lucida	C	2	3.48	6.124		19.7034	0.0617834	3.3324	3.31668	0.00315828	8.12673	3.08798	5.922	0.00322321	1.68211	0.0117849	0.216257	0.291096	0.000402901	0.0674859	0.171233
June	2011	6.09	S. lucida	C	3	5.16	5.719		31.7902	0.0729364	3.92147	5.03844	0.00685303	4.6436	1.85468	5.206	0.00192581	3.78745	0.0102372	0.25076	0.55595	0.000810866	0.06791	0.172309
June	2011	7.99	S. lucida	A	1	4.32	15.569		37.3553	0.053274	1.95941	5.26455	0.00288671	4.02624	2.49932	6.772	0.00118601	2.29314	0.00494169	0.281676	0.278415	0.000593003	0.0662186	0.168017
June	2011	7.99	S. lucida	A	2	3.88	18.301		30.7835	0.0358929	1.90171	4.72091	0.00292106	3.50048	1.69772	6.166	0.00102145	1.18315	0.00674157	0.291113	0.284678	0.00102145	0.0684372	0.173647
June	2011	7.99	S. lucida	A	3	6.52	16.894
July	2011	6.09	S. lucida	C	1	2.64	6.26		26.4865	0.043515	2.71138	2.96044	0.00478274	3.32644	1.26708	5.314	0.00209354	2.77771	0.0121425	0.180568	0.490307	0.000418708	0.0701336	0.177951
July	2011	6.09	S. lucida	C	2	2	6.124		19.7034	0.0617834	3.3324	3.31668	0.00315828	8.12673	3.08798	5.922	0.00322321	1.68211	0.0117849	0.216257	0.291096	0.000402901	0.0674859	0.171233
July	2011	6.09	S. lucida	C	3	3.2	5.719		31.7902	0.0729364	3.92147	5.03844	0.00685303	4.6436	1.85468	5.206	0.00192581	3.78745	0.0102372	0.25076	0.55595	0.000810866	0.06791	0.172309
July	2011	7.99	S. lucida	A	1	3.88	15.569		37.3553	0.053274	1.95941	5.26455	0.00288671	4.02624	2.49932	6.772	0.00118601	2.29314	0.00494169	0.281676	0.278415	0.000593003	0.0662186	0.168017
July	2011	7.99	S. lucida	A	2	3.08	18.301		30.7835	0.0358929	1.90171	4.72091	0.00292106	3.50048	1.69772	6.166	0.00102145	1.18315	0.00674157	0.291113	0.284678	0.00102145	0.0684372	0.173647
July	2011	7.99	S. lucida	A	3	3.52	16.894
Aug	2011	6.09	S. lucida	C	1	1.08	6.26		26.4865	0.043515	2.71138	2.96044	0.00478274	3.32644	1.26708	5.314	0.00209354	2.77771	0.0121425	0.180568	0.490307	0.000418708	0.0701336	0.177951
Aug	2011	6.09	S. lucida	C	2	1.12	6.124		19.7034	0.0617834	3.3324	3.31668	0.00315828	8.12673	3.08798	5.922	0.00322321	1.68211	0.0117849	0.216257	0.291096	0.000402901	0.0674859	0.171233
Aug	2011	6.09	S. lucida	C	3	9.8	5.719		31.7902	0.0729364	3.92147	5.03844	0.00685303	4.6436	1.85468	5.206	0.00192581	3.78745	0.0102372	0.25076	0.55595	0.000810866	0.06791	0.172309
Aug	2011	7.99	S. lucida	A	1	5.04	15.569		37.3553	0.053274	1.95941	5.26455	0.00288671	4.02624	2.49932	6.772	0.00118601	2.29314	0.00494169	0.281676	0.278415	0.000593003	0.0662186	0.168017
Aug	2011	7.99	S. lucida	A	2	8.52	18.301		30.7835	0.0358929	1.90171	4.72091	0.00292106	3.50048	1.69772	6.166	0.00102145	1.18315	0.00674157	0.291113	0.284678	0.00102145	0.0684372	0.173647
Aug	2011	7.99	S. lucida	A	3	7.4	16.894
Sep	2011	6.09	S. lucida	C	1	2.88	6.26		26.4865	0.043515	2.71138	2.96044	0.00478274	3.32644	1.26708	5.314	0.00209354	2.77771	0.0121425	0.180568	0.490307	0.000418708	0.0701336	0.177951
Sep	2011	6.09	S. lucida	C	2	3	6.124		19.7034	0.0617834	3.3324	3.31668	0.00315828	8.12673	3.08798	5.922	0.00322321	1.68211	0.0117849	0.216257	0.291096	0.000402901	0.0674859	0.171233
Sep	2011	6.09	S. lucida	C	3	2.44	5.719		31.7902	0.0729364	3.92147	5.03844	0.00685303	4.6436	1.85468	5.206	0.00192581	3.78745	0.0102372	0.25076	0.55595	0.000810866	0.06791	0.172309
Sep	2011	7.99	S. lucida	A	1	2.64	15.569		37.3553	0.053274	1.95941	5.26455	0.00288671	4.02624	2.49932	6.772	0.00118601	2.29314	0.00494169	0.281676	0.278415	0.000593003	0.0662186	0.168017
Sep	2011	7.99	S. lucida	A	2	1.28	18.301		30.7835	0.0358929	1.90171	4.72091	0.00292106	3.50048	1.69772	6.166	0.00102145	1.18315	0.00674157	0.291113	0.284678	0.00102145	0.0684372	0.173647
Sep	2011	7.99	S. lucida	A	3	2.16	16.894
Oct	2011	6.09	S. lucida	C	1	1.32	6.26		26.4865	0.043515	2.71138	2.96044	0.00478274	3.32644	1.26708	5.314	0.00209354	2.77771	0.0121425	0.180568	0.490307	0.000418708	0.0701336	0.177951
Oct	2011	6.09	S. lucida	C	2	1.72	6.124		19.7034	0.0617834	3.3324	3.31668	0.00315828	8.12673	3.08798	5.922	0.00322321	1.68211	0.0117849	0.216257	0.291096	0.000402901	0.0674859	0.171233
Oct	2011	6.09	S. lucida	C	3	3.16	5.719		31.7902	0.0729364	3.92147	5.03844	0.00685303	4.6436	1.85468	5.206	0.00192581	3.78745	0.0102372	0.25076	0.55595	0.000810866	0.06791	0.172309
Oct	2011	7.99	S. lucida	A	1	3.08	15.569		37.3553	0.053274	1.95941	5.26455	0.00288671	4.02624	2.49932	6.772	0.00118601	2.29314	0.00494169	0.281676	0.278415	0.000593003	0.0662186	0.168017
Oct	2011	7.99	S. lucida	A	2	1.92	18.301		30.7835	0.0358929	1.90171	4.72091	0.00292106	3.50048	1.69772	6.166	0.00102145	1.18315	0.00674157	0.291113	0.284678	0.00102145	0.0684372	0.173647
Oct	2011	7.99	S. lucida	A	3	4.8	16.894
Nov	2011	6.09	S. lucida	C	1	12.28	6.26		26.4865	0.043515	2.71138	2.96044	0.00478274	3.32644	1.26708	5.314	0.00209354	2.77771	0.0121425	0.180568	0.490307	0.000418708	0.0701336	0.177951
Nov	2011	6.09	S. lucida	C	2	16.28	6.124		19.7034	0.0617834	3.3324	3.31668	0.00315828	8.12673	3.08798	5.922	0.00322321	1.68211	0.0117849	0.216257	0.291096	0.000402901	0.0674859	0.171233
Nov	2011	6.09	S. lucida	C	3	11.96	5.719		31.7902	0.0729364	3.92147	5.03844	0.00685303	4.6436	1.85468	5.206	0.00192581	3.78745	0.0102372	0.25076	0.55595	0.000810866	0.06791	0.172309
Nov	2011	7.99	S. lucida	A	1	13.52	15.569		37.3553	0.053274	1.95941	5.26455	0.00288671	4.02624	2.49932	6.772	0.00118601	2.29314	0.00494169	0.281676	0.278415	0.000593003	0.0662186	0.168017
Nov	2011	7.99	S. lucida	A	2	9.68	18.301		30.7835	0.0358929	1.90171	4.72091	0.00292106	3.50048	1.69772	6.166	0.00102145	1.18315	0.00674157	0.291113	0.284678	0.00102145	0.0684372	0.173647
Nov	2011	7.99	S. lucida	A	3	12.8	16.894
Dec	2011	6.09	S. lucida	C	1	1.32	6.26		26.4865	0.043515	2.71138	2.96044	0.00478274	3.32644	1.26708	5.314	0.00209354	2.77771	0.0121425	0.180568	0.490307	0.000418708	0.0701336	0.177951
Dec	2011	6.09	S. lucida	C	2	6.72	6.124		19.7034	0.0617834	3.3324	3.31668	0.00315828	8.12673	3.08798	5.922	0.00322321	1.68211	0.0117849	0.216257	0.291096	0.000402901	0.0674859	0.171233
Dec	2011	6.09	S. lucida	C	3	13	5.719		31.7902	0.0729364	3.92147	5.03844	0.00685303	4.6436	1.85468	5.206	0.00192581	3.78745	0.0102372	0.25076	0.55595	0.000810866	0.06791	0.172309
Dec	2011	7.99	S. lucida	A	1	31.84	15.569		37.3553	0.053274	1.95941	5.26455	0.00288671	4.02624	2.49932	6.772	0.00118601	2.29314	0.00494169	0.281676	0.278415	0.000593003	0.0662186	0.168017
Dec	2011	7.99	S. lucida	A	2	17.84	18.301		30.7835	0.0358929	1.90171	4.72091	0.00292106	3.50048	1.69772	6.166	0.00102145	1.18315	0.00674157	0.291113	0.284678	0.00102145	0.0684372	0.173647
Dec	2011	7.99	S. lucida	A	3	15.48	16.894
Dec	2011	16.82	S. glauca	A	1	27.56	10.842	0.163801	16.0126	0.196456	1.67359	0.907505	0.00814797	1.35874	0.615341	7.104	0.000882457	1.71558	0.00335334	0.2515	0.253706	0.00114719	0.0591246	0.150018
Dec	2011	16.82	S. glauca	A	2	24.52	7.774		35.2407	0.0545567	2.52214	4.46992	0.0193341	1.52385	4.56339	5.569	0.000998004	1.37535	0.00848303	0.284431	0.227645	0.000998004	0.0668663	0.169661
Dec	2011	16.82	S. glauca	A	3	24.96	10.747		33.8389	0.0490857	3.49904	3.57746	0.0223207	2.65796	3.09028	4.889	0.000850774	0.908201	0.00535988	0.242471	0.165646	0.000935852	0.0570019	0.144632
Dec	2011	16.82	A. imbricata	B	1	6.64	17.65	0.0141685	32.4593	0.0687174	4.93565	4.6438	0.0169775	4.05302	0.504288	5.568	0.00496916	1.54447	0.0210761	0.244174	0.244859	0.00411241	0.0574023	0.119431
Dec	2011	16.82	A. imbricata	B	2	6.04	11.706	0.248676	21.9665	0.25479	1.77023	0.973031	0.00691135	1.5177	0.742247	5.545	0.00197628	1.71473	0.00957738	0.216631	0.210626	0.000684099	0.0509273	0.129219
Dec	2011	16.82	A. imbricata	B	3	6.4	12.194	0.207906	22.3278	0.28107	1.1361	0.879398	0.00698997	0.654913	0.570576	6.25	0.00591668	1.81504	0.0276382	0.230994	0.262522	0.000891555	0.0543038	0.137786
Dec	2011	16.82	M. muricata	C	1	7.48	11.641	0.338064	23.7416	0.338056	1.79972	0.947861	0.00850132	0.779085	0.747092	7.246	0.0130881	1.11081	0.038203	0.252034	0.22913	0.000619031	0.0592501	0.150336
Dec	2011	16.82	M. muricata	C	2	8.8	10.195	0.208301	26.9793	0.326954	3.61747	3.00531	0.0322794	1.16116	1.8834	5.298	0.00208	0.64344	0.0076	0.228	0.12696	0.00024	0.0536	0.11216
Dec	2011	16.82	M. muricata	C	3	7.76	8.806	0.110181	31.0752	0.183023	4.91176	3.4012	0.0320038	2.06214	2.15043	4.635	0.00303132	0.703772	0.0119569	0.23998	0.187353	0.000673627	0.0543954	0.143146

## Sheet: 15N data
d15N and Li
	Notes
	1. Plants (same as those found in the field) were grown in the green house and experiemnt done in a phytotron chamber
	2. Concetration for Lithium was adjusted to the volume applied on the leaf
Species name	Rep	Control (d15N per mil)	Glycine-Enrichment (d15N per mil)	Nitrate-Enrichment (d15N per mil)	Ammonium-Enrichment (d15N per mil)	Li (mg/g)
A. imbricata	1	0.620119	4.83062	6.02231	0.559708	4.92142
A. imbricata	2	0.592358		7.45686	1.19097	3.19513
A. imbricata	3	0.68028	4.26409	7.17087	1.33158	7.63191
M. muricata	1	0.485225	4.49246	6.39604	1.07317	5.28325
M. muricata	2	0.334595	3.54554	4.41791	0.383026	3.55701
M. muricata	3	0.420772	3.81515	5.24031	0.645747	10.2375
M. cordifolia	1	1.60302	2.36875	3.59835	2.3581	3.94054
M. cordifolia	2	1.43483	2.52484	4.05145	2.24163	7.63575
M. cordifolia	3	2.1202	1.71754	3.30047	2.07287	7.5766
C. monilifera	1	1.54017	1.92923	2.46329	2.08007	0.749358
C. monilifera	2	1.09299	1.2296	5.20525	5.71279	0.244073
C. monilifera	3	1.80832	1.65011	4.44833	3.8175	0.329033
S. lucida	1	0.616413	0.495666	1.04216	1.13944	0.468753
S. lucida	2	0.693354	0.405432	1.22468	1.04334	0.277112
S. lucida	3	0.569663	1.56355	1.78414	1.44177	0.443425
S. glauca	1	1.22089	0.664937	1.64978	4.71764	0.349279
S. glauca	2	0.640938	1.12912	3.9205	5.0881	0.367086
S. glauca	3					0.306384
